# Supplementary material for: Pd-catalyzed coupling of β-hydroxy α-diazocarbonyl compounds with aryl iodides: a migratory insertion/β-hydroxy elimination sequence
Source: Royal Society of Chemistry journal article supplement (doi:10.1039/c0cc05523a), 2011-01-01

## Pd-Catalyzed Coupling of $\beta$ -Hydroxy $\alpha$ -Diazocarbonyl Compounds with Aryl Iodides: A Migratory Insertion/ $\beta$ -Hydroxy Elimination Sequence

Lei Zou, Yizhou Liu, Yan Zhang and Jianbo Wang\*

Beijing National Laboratory of Molecular Sciences (BNLMS) and Key Laboratory of Bioorganic Chemistry and Molecular Engineering of Ministry of Education, College of Chemistry, Peking University, Beijing 100871, China

Email: [wangjb@pku.edu.cn](mailto:wangjb@pku.edu.cn)

**General** All reactions were performed under a nitrogen atmosphere in a flame-dried reaction flask. All solvents were distilled prior to use. THF and toluene were dried over Na before use. For chromatography, 200-300 mesh silica gel (Qingdao, China) was employed.  $^1\text{H}$  NMR and  $^{13}\text{C}$  NMR spectra were recorded on Varian 300 or Bruker ARX 400 spectrometer in  $\text{CDCl}_3$  solution and the chemical shifts were reported in parts per million (d) relative to internal standard TMS (0 ppm). Unless otherwise noted, materials obtained from commercial suppliers were used without further purification.

### General Procedure for the Preparation of Ethyl 2-Diazo-3-hydroxy Carboxylates.<sup>1</sup>

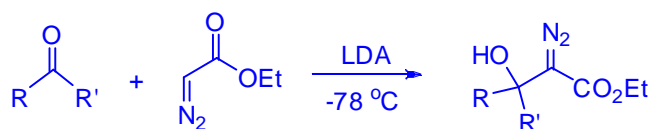

A cold (-10 °C) solution of lithium diisopropylamide [prepared by the addition of *n*-butyllithium in hexane (10 mL of a 2.5 M solution) to a solution of diisopropylamine (2.5 g) in THF (15 mL)] was added during 30 min to a stirred solution of the appropriate ketone (20 mmol) and ethyl diazoacetate (20 mmol) at -78 °C. The mixture was allowed to stir at -78 °C for 2 h, at which time the reaction was quenched with a saturated  $\text{NH}_4\text{Cl}$  solution and extracted with ether. The combined organic extracts were washed with saturated aqueous  $\text{NaHCO}_3$  solution and brine, dried over anhydrous  $\text{Na}_2\text{SO}_4$ , and concentrated under reduced pressure. The crude residue was subjected to flash silica gel chromatography to afford the pure ethyl 2-diazo-3-hydroxy carboxylate.

### General Procedure for the Pd-Catalyzed Reactions

$\text{Pd}_2(\text{dba})_3$  (2.5 mol%, 11.3 mg), 2-(dicyclohexylphosphino)-2',4',6'-triisopropylbiphenyl (Xphos, 10 mol%, 23.7 mg) and aryl iodide (0.6 mmol) were suspended in THF (3 mL) in a 10 mL Schlenk tube under nitrogen. Then diisopropylamine (0.22 mL, 1.5 mmol) and  $\alpha$ -hydroxyl diazo compound (0.5 mmol) were added. The resulting solution was stirred at 70 °C for 24 h. After cooling to room temperature, the resulting mixture was filtered through a short path of silica gel, eluting with ethyl acetate. The volatile compounds were removed *in vacuo* and the crude residue was purified by column chromatography ( $\text{SiO}_2$ , hexane).

### Spectral Data

#### Ethyl 2-Diazo-2-(1-hydroxycyclopentyl)acetate (1)<sup>1</sup>

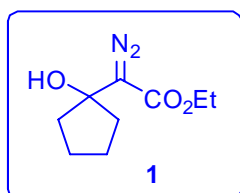

IR (neat) 3460, 2967, 2089, 1697, 1370, 1301, 1108, 750  $\text{cm}^{-1}$ ;  $^1\text{H}$  NMR (300 MHz,  $\text{CDCl}_3$ )  $\delta$  1.25 (t,  $J = 7.2$  Hz, 3H), 1.67-1.92 (m, 6H), 2.01-2.09 (m, 2H), 3.26 (s, 1H), 4.25 (q,  $J = 7.2$  Hz, 2H).

#### Ethyl 2-Diazo-2-(1-hydroxycyclohexyl)acetate (5a)<sup>2</sup>

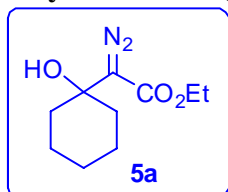

IR (neat) 3468, 2972, 2091, 1695, 1374, 1109, 752  $\text{cm}^{-1}$ ;  $^1\text{H}$  NMR (300 MHz,  $\text{CDCl}_3$ )  $\delta$  1.27 (t,  $J = 7.2$  Hz, 3H), 1.32-1.90 (m, 10H), 3.32 (s, 1H), 4.26 (q,  $J = 7.2$  Hz, 2H).

#### Ethyl 2-Diazo-2-(1-hydroxy-4-methylcyclohexyl)acetate (5b)

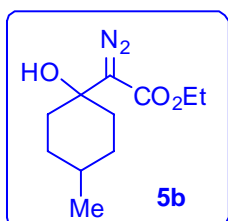

IR (neat) 3483, 2926, 2088, 1673, 1370, 1297, 1114, 1079, 744  $\text{cm}^{-1}$ ;  $^1\text{H}$  NMR (400 MHz,  $\text{CDCl}_3$ )  $\delta$  0.93 (d,  $J = 5.6$  Hz, 3H), 1.28 (t,  $J = 7.2$  Hz, 3H), 1.40-1.69 (m, 7H), 2.04-2.07 (m, 2H), 3.47 (s, 1H), 4.23 (q,  $J = 7.2$  Hz, 2H);  $^{13}\text{C}$  NMR (100 MHz,  $\text{CDCl}_3$ )  $\delta$  14.5, 22.2, 29.8, 31.9, 36.1, 60.8, 69.1, 167.5.

**Ethyl 2-(4-*tert*-butyl-1-hydroxycyclohexyl)-2-diazoacetate (5c)**

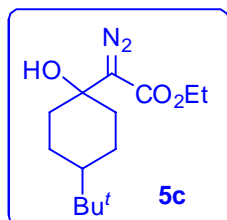

IR (neat) 2949, 2868, 2087, 1681, 1366, 1291, 1084, 747  $\text{cm}^{-1}$ ;  $^1\text{H}$  NMR (300 MHz,  $\text{CDCl}_3$ )  $\delta$  0.83 (s, 9H), 0.89-1.06 (m, 3H), 1.27 (t,  $J = 7.2$  Hz, 3H), 1.50-1.60 (m, 2H), 1.69-1.74 (m, 2H), 2.24-2.29 (m, 2H), 3.51 (s, 1H), 4.22 (q,  $J = 7.2$  Hz, 2H);  $^{13}\text{C}$  NMR (100 MHz,  $\text{CDCl}_3$ )  $\delta$  14.25, 14.28, 24.2, 27.3, 27.4, 32.0, 36.9, 46.8, 60.6, 71.8, 166.9.

**Ethyl 2-Diazo-2-(1-hydroxy-4-phenylcyclohexyl)acetate (5d)**

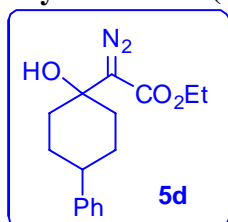

IR (neat) 3477, 2933, 2088, 1686, 1368, 1302, 1099, 746, 700  $\text{cm}^{-1}$ ;  $^1\text{H}$  NMR (400 MHz,  $\text{CDCl}_3$ )  $\delta$  1.30 (t,  $J = 7.2$  Hz, 3H), 1.57-1.78 (m, 4H), 1.97-2.03 (m, 2H), 2.20-2.23 (m, 2H), 2.51-2.57 (m, 1H), 3.59 (s, 1H), 4.26 (q,  $J = 7.2$  Hz, 2H);  $^{13}\text{C}$  NMR (100 MHz,  $\text{CDCl}_3$ )  $\delta$  14.6, 28.9, 36.6, 43.7, 61.0, 68.9, 126.2, 127.0, 128.5, 146.7, 167.5.

**Ethyl 2-Diazo-3-ethyl-3-hydroxypentanoate (5e)**

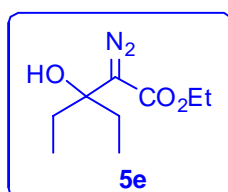

IR (neat) 3368, 2977, 2094, 1671, 1370, 1310, 1085, 1048, 908, 734  $\text{cm}^{-1}$ ;  $^1\text{H}$  NMR (400 MHz,  $\text{CDCl}_3$ )  $\delta$  0.94 (t,  $J = 7.2$  Hz, 6H), 1.29 (t,  $J = 7.2$  Hz, 3H), 1.75 (t,  $J = 7.2$  Hz, 4H), 3.83 (s, 1H), 4.22 (q,  $J = 7.2$  Hz, 2H);  $^{13}\text{C}$  NMR (100 MHz,  $\text{CDCl}_3$ )  $\delta$  8.1, 14.5, 31.5, 60.9, 74.0, 167.8.

**Ethyl 2-Diazo-3-hydroxy-3-methylpentanoate (5f)<sup>3</sup>**

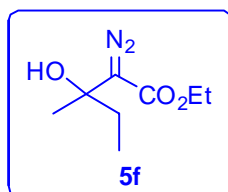

IR (neat) 3473, 2977, 2091, 1673, 1370, 1307, 1081, 745  $\text{cm}^{-1}$ ;  $^1\text{H}$  NMR (400 MHz,  $\text{CDCl}_3$ )  $\delta$  0.94 (t,  $J = 7.2$  Hz, 3H), 1.29 (t,  $J = 7.2$  Hz, 3H), 1.68 (s, 3H), 1.76-1.88 (m, 2H), 3.79 (s, 1H), 4.25 (q,  $J = 7.2$  Hz, 2H);  $^{13}\text{C}$  NMR (100 MHz,  $\text{CDCl}_3$ )  $\delta$  8.8, 14.5, 25.2, 34.5, 60.9, 71.6, 167.5.

**Ethyl 2-Diazo-3-hydroxy-3-phenylbutanoate (5g)**

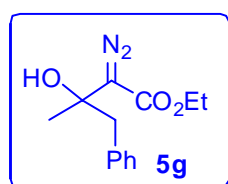

IR (neat) 3324, 2974, 2362, 2090, 1676, 1307, 1049, 731  $\text{cm}^{-1}$ ;  $^1\text{H}$  NMR (400 MHz,  $\text{CDCl}_3$ )  $\delta$  1.21 (t,  $J = 7.2$  Hz, 3H), 1.70 (s, 3H), 4.18 (q,  $J = 7.2$  Hz, 2H), 4.35 (s, 1H), 7.25-7.34 (m, 3H), 7.47-7.49 (m, 2H);  $^{13}\text{C}$  NMR (100 MHz,  $\text{CDCl}_3$ )  $\delta$  14.4, 29.2, 61.1, 73.3, 124.7, 127.7, 128.5, 146.3, 167.0.

### Ethyl 2-Cyclopentylidene-2-(4-methoxyphenyl)acetate (3)

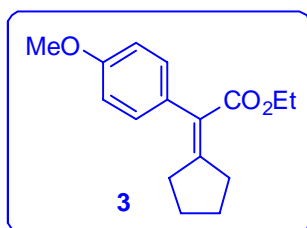

IR (film) 2952, 1705, 1608, 1511, 1245, 1206, 1038, 834  $\text{cm}^{-1}$ ;  $^1\text{H}$  NMR (400 MHz,  $\text{CDCl}_3$ )  $\delta$  1.21 (t,  $J = 7.2$  Hz, 3H), 1.57-1.62 (m, 2H), 1.72-1.79 (m, 2H), 2.21 (t,  $J = 7.2$  Hz, 2H), 2.84 (t,  $J = 7.2$  Hz, 2H), 3.81 (s, 3H), 4.15 (q,  $J = 7.2$  Hz, 2H), 6.86 (d,  $J = 8.6$  Hz, 2H), 7.08 (d,  $J = 8.6$  Hz, 2H);  $^{13}\text{C}$  NMR (100 MHz,  $\text{CDCl}_3$ )  $\delta$  14.5, 26.0, 26.9, 34.1, 35.4, 55.3, 60.2, 113.5, 125.4, 130.5, 131.6, 158.4, 162.4, 167.9; MS (70 eV)  $m/z$  (%) 260 (100) ( $\text{M}^+$ ), 231(25), 214(66), 203(9), 185(94), 171(19), 159(23); HRMS (ESI) calcd for  $\text{C}_{16}\text{H}_{21}\text{O}_3$  [( $\text{M}+\text{H}$ ) $^+$ ] 261.1485, found: 261.1484.

### Ethyl 2-Cyclohexylidene-2-(4-methoxyphenyl)acetate (6a)

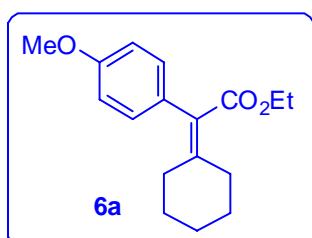

IR (film) 2930, 2854, 1711, 1607, 1509, 1261, 1244, 1188, 1033, 836  $\text{cm}^{-1}$ ;  $^1\text{H}$  NMR (400 MHz,  $\text{CDCl}_3$ )  $\delta$  1.22 (t,  $J = 7.2$  Hz, 3H), 1.54-1.69 (m, 6H), 2.01 (t,  $J = 6.2$  Hz, 2H), 2.48 (t,  $J = 6.2$  Hz, 2H), 3.79 (s, 3H), 4.16 (q,  $J = 7.2$  Hz, 2H), 6.86 (d,  $J = 8.4$  Hz, 2H), 7.12 (d,  $J = 8.4$  Hz, 2H);  $^{13}\text{C}$  NMR (100 MHz,  $\text{CDCl}_3$ )  $\delta$  14.3, 26.5, 28.32, 28.36, 32.0, 32.8, 55.3, 60.5, 113.6, 127.3, 129.8, 130.6, 148.3, 158.6, 169.7; MS (70 eV)  $m/z$  (%): 274 (100) ( $\text{M}^+$ ), 245(11), 228(87), 217(11), 199(89), 184(19), 171(29), 159(24); HRMS (ESI) calcd for  $\text{C}_{17}\text{H}_{23}\text{O}_3$  [( $\text{M}+\text{H}$ ) $^+$ ] 275.1641, found: 275.1644.

### Ethyl 2-Cyclohexylidene-2-phenylacetate (6b)

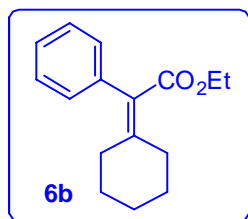

IR (film) 2927, 2854, 1712, 1510, 1448, 1260, 1188, 1035, 732  $\text{cm}^{-1}$ ;  $^1\text{H}$  NMR (400 MHz,  $\text{CDCl}_3$ )  $\delta$  1.22 (t,  $J = 7.2$  Hz, 3H), 1.54-1.72 (m, 6H), 2.08 (t,  $J = 6.2$  Hz, 2H), 2.52 (t,  $J = 6.2$  Hz, 2H), 4.16 (q,  $J = 7.2$  Hz, 2H), 7.19-7.34 (m, 5H);  $^{13}\text{C}$  NMR (100 MHz,  $\text{CDCl}_3$ )  $\delta$  14.1, 26.3, 28.22, 28.25, 32.0, 32.6, 60.4, 126.9, 127.6, 128.0, 129.4, 137.4, 148.9, 169.2; MS (70 eV)  $m/z$  (%): 244 (100) ( $\text{M}^+$ ), 229(12), 212(91), 183(64), 169(36), 155(36); HRMS (ESI) calcd for  $\text{C}_{16}\text{H}_{21}\text{O}_2$  [( $\text{M}+\text{H}$ ) $^+$ ] 245.1536, found: 245.1529.

### Ethyl 2-Cyclohexylidene-2-p-tolylacetate (6c)

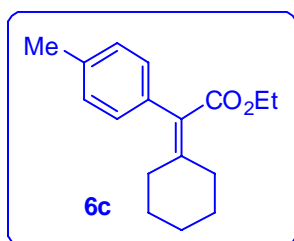

IR (film) 2928, 2854, 1712, 1444, 1260, 1218, 1187, 1106, 1037, 919, 773, 700  $\text{cm}^{-1}$ ;  $^1\text{H}$  NMR (400 MHz,  $\text{CDCl}_3$ )  $\delta$  1.23 (t,  $J = 7.2$  Hz, 3H), 1.56-1.74 (m, 6H), 2.12 (t,  $J = 6.2$  Hz, 2H), 2.36 (s, 3H), 2.51 (t,  $J = 6.2$  Hz, 2H), 4.18 (q,  $J = 7.2$  Hz, 2H), 7.10-7.17 (m, 4H);  $^{13}\text{C}$  NMR (100 MHz,  $\text{CDCl}_3$ )  $\delta$  14.1, 21.1, 26.4, 28.20, 28.23, 31.9, 32.6, 60.4, 127.5, 128.8, 129.2, 134.4, 136.5, 148.3, 169.4; MS (70 eV)  $m/z$  (%): 258 (100) ( $\text{M}^+$ ), 229(12), 212(91), 183(64), 169(36), 155(36); HRMS (ESI) calcd for  $\text{C}_{17}\text{H}_{23}\text{O}_2$  [ $\text{M}+\text{H}$ ] $^+$  259.1692, found: 259.1687.

### Ethyl 2-Cyclohexylidene-2-m-tolylacetate (6d)

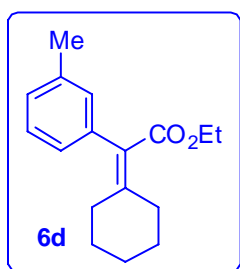

IR (film) 2927, 2855, 1713, 1447, 1261, 1203, 1037, 732  $\text{cm}^{-1}$ ;  $^1\text{H}$  NMR (400 MHz,  $\text{CDCl}_3$ )  $\delta$  1.22 (t,  $J = 7.2$  Hz, 3H), 1.54-1.71 (m, 6H), 2.09 (t,  $J = 6.4$  Hz, 2H), 2.33 (s, 3H), 2.48 (t,  $J = 6.4$  Hz, 2H), 4.16 (q,  $J = 7.2$  Hz, 2H), 6.99-7.26 (m, 4H);  $^{13}\text{C}$  NMR (100 MHz,  $\text{CDCl}_3$ )  $\delta$  14.2, 21.4, 26.4, 28.22, 28.26, 32.0, 32.7, 60.4, 126.4, 127.7, 127.8, 127.9, 137.2, 137.6, 148.2, 169.4; MS (70 eV)  $m/z$  (%): 258 (92) ( $\text{M}^+$ ), 229(12), 212(100), 203(9), 183(54), 169(46), 155(35); HRMS (ESI) calcd. for  $\text{C}_{17}\text{H}_{23}\text{O}_2$  [ $\text{M}+\text{H}$ ] $^+$  259.1692, found: 259.1687.

### Ethyl 2-Cyclohexylidene-2-o-tolylacetate (6e)

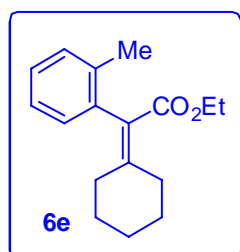

IR (film) 2928, 2855, 1709, 1448, 1261, 1200, 1184, 1104, 1035, 909, 733  $\text{cm}^{-1}$ ;  $^1\text{H}$  NMR (400 MHz,  $\text{CDCl}_3$ )  $\delta$  1.19 (t,  $J = 7.2$  Hz, 3H), 1.52-1.74 (m, 6H), 1.89-1.93 (m, 2H), 2.23 (s, 3H), 2.66-2.70 (m, 2H), 4.14 (q,  $J = 7.2$  Hz, 2H), 7.08-7.20 (m, 4H);  $^{13}\text{C}$  NMR (100 MHz,  $\text{CDCl}_3$ )  $\delta$  14.1, 19.7, 26.4, 28.0, 28.2, 31.9, 32.6, 60.1, 125.4, 126.3, 127.1, 129.6, 129.8, 136.8, 137.6, 151.6, 168.4; MS (70 eV)  $m/z$  (%) 258(100) ( $\text{M}^+$ ), 229(7), 212(61), 183(56), 169(22), 155(25); HRMS (ESI) calcd for  $\text{C}_{17}\text{H}_{23}\text{O}_2$  [ $\text{M}+\text{H}$ ] $^+$  259.1692, found: 259.1686.

### Ethyl 2-Cyclohexylidene-2-(2,3-dimethylphenyl)acetate (6f)

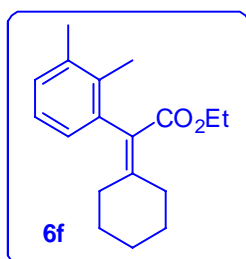

IR (film) 2927, 2854, 1710, 1448, 1262, 1198, 1094, 1033, 764, 731  $\text{cm}^{-1}$ ;  $^1\text{H}$  NMR (400 MHz,  $\text{CDCl}_3$ )  $\delta$  1.14 (t,  $J = 7.2$  Hz, 3H), 1.43-1.69 (m, 6H), 1.82-1.86 (m, 2H), 2.09 (s, 3H), 2.24 (s, 3H), 2.58-2.61 (m, 2H), 4.07 (q,  $J = 7.2$  Hz, 2H), 6.89-7.02 (m, 3H);  $^{13}\text{C}$  NMR (100 MHz,  $\text{CDCl}_3$ )  $\delta$  14.2, 16.3, 20.5, 26.4, 27.9, 28.3, 32.0, 32.5, 60.2, 125.1, 126.9, 127.6, 128.7, 135.4, 136.6, 137.6, 150.7, 168.7; MS (70 eV)  $m/z$  (%): 272 (100) ( $\text{M}^+$ ), 257(5), 243(6), 226(86), 211(10), 197(45), 183(41), 169(19), 155(42); HRMS (ESI) calcd for  $\text{C}_{18}\text{H}_{25}\text{O}_2$  [ $(\text{M}+\text{H})^+$ ] 273.1849, found: 273.1845.

### Ethyl 2-(Biphenyl-4-yl)-2-cyclohexylideneacetate (6g)

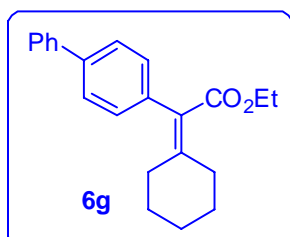

IR (film) 2929, 2854, 1714, 1485, 1447, 1264, 1186, 1034, 759, 733, 697  $\text{cm}^{-1}$ ;  $^1\text{H}$  NMR (400 MHz,  $\text{CDCl}_3$ )  $\delta$  1.20 (t,  $J = 7.2$  Hz, 3H), 1.53-1.87 (m, 6H), 2.11 (t,  $J = 6.4$  Hz, 2H), 2.49 (t,  $J = 6.4$  Hz, 2H), 4.15 (q,  $J = 7.2$  Hz, 2H), 7.21-7.31 (m, 3H), 7.37-7.41 (m, 2H), 7.51-7.57 (m, 4H);  $^{13}\text{C}$  NMR (100 MHz,  $\text{CDCl}_3$ )  $\delta$  14.2, 26.4, 27.5, 28.2, 32.1, 32.7, 60.5, 126.8, 127.0, 127.2, 127.3, 128.7, 129.8, 136.4, 139.7, 140.8, 149.0, 169.3; MS (70 eV)  $m/z$  (%): 320 (100) ( $\text{M}^+$ ), 291(8), 274(88), 245(46), 231(11), 217(35), 205(23), 191(25), 178(21), 165(27), 152(15); HRMS (ESI) calcd for  $\text{C}_{22}\text{H}_{25}\text{O}_2$  [ $(\text{M}+\text{H})^+$ ] 321.1849, found: 321.1844.

### Ethyl 2-(4-Chlorophenyl)-2-cyclohexylideneacetate (6h)

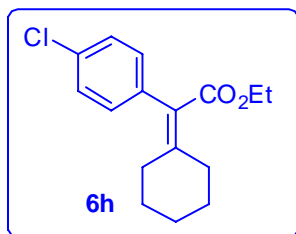

IR (film) 2929, 2854, 1712, 1448, 1260, 1188, 1035, 732  $\text{cm}^{-1}$ ;  $^1\text{H}$  NMR (400 MHz,  $\text{CDCl}_3$ )  $\delta$  1.21 (t,  $J = 7.2$  Hz, 3H), 1.53-1.71 (m, 6H), 2.05 (t,  $J = 6.4$  Hz, 2H), 2.53 (t,  $J = 6.4$  Hz, 2H), 4.15 (q,  $J = 7.2$  Hz, 2H), 7.12 (d,  $J = 8.4$  Hz, 2H), 7.29 (d,  $J = 8.4$  Hz, 2H);  $^{13}\text{C}$  NMR (100 MHz,  $\text{CDCl}_3$ )  $\delta$  14.1, 26.3, 28.2, 32.2, 32.5, 60.5, 126.5, 128.3, 130.8, 132.9, 136.0, 150.4, 168.7; MS (70 eV)  $m/z$  (%): 278 (76) ( $\text{M}^+$ ), 249(15), 232(100), 203(39), 191(6), 182(12), 169(67), 153(15); HRMS (ESI) calcd for  $\text{C}_{16}\text{H}_{20}\text{ClO}_2$  [ $(\text{M}+\text{H})^+$ ] 279.1146, found: 279.1139.

### Ethyl 2-Cyclohexylidene-2-(naphthalen-1-yl)acetate (6i)

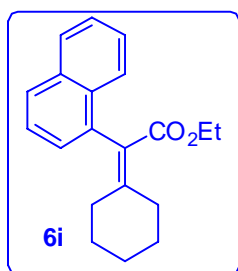

IR (film) 2929, 2854, 1709, 1532, 1263, 1199, 1091, 1031, 779  $\text{cm}^{-1}$ ;  $^1\text{H}$  NMR (400 MHz,  $\text{CDCl}_3$ )  $\delta$  1.04 (t,  $J = 7.2$  Hz, 3H), 1.39-1.42 (m, 2H), 1.53-1.56 (m, 2H), 1.72-1.85 (m, 4H), 2.68-2.75 (m, 2H), 4.03 (q,  $J = 7.2$  Hz, 2H), 7.27-7.29 (m, 1H), 7.39-7.43 (m, 3H), 7.74-7.90 (m, 3H);  $^{13}\text{C}$  NMR (100 MHz,  $\text{CDCl}_3$ )  $\delta$  14.1, 26.4, 28.2, 28.4, 32.2, 32.9, 60.3, 125.2, 125.3, 125.6, 125.7, 125.9, 127.2, 127.5, 128.1, 132.5, 133.6, 135.7, 152.8, 168.7; MS (70 eV)  $m/z$  (%): 294(100) ( $\text{M}^+$ ), 265(19), 248(81), 219(73), 205(20), 191(58), 178(57), 165(65), 153(35); HRMS (ESI) calcd for  $\text{C}_{20}\text{H}_{23}\text{O}_2$  [ $\text{M}+\text{H}$ ] $^+$  295.1692, found: 295.1687.

### Ethyl 2-Cyclohexylidene-2-(4-methoxy-2-nitrophenyl)acetate (6j)

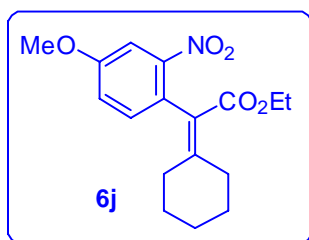

IR (film) 2927, 2853, 1712, 1617, 1531, 1352, 1263, 1191, 1035, 733  $\text{cm}^{-1}$ ;  $^1\text{H}$  NMR (400 MHz,  $\text{CDCl}_3$ )  $\delta$  1.24 (t,  $J = 7.2$  Hz, 3H), 1.56-1.71 (m, 6H), 2.07 (t,  $J = 6.0$  Hz, 2H), 2.58 (t,  $J = 6.0$  Hz, 2H), 3.97 (s, 3H), 4.16 (q,  $J = 7.2$  Hz, 2H), 7.05 (d,  $J = 8.4$  Hz, 1H), 7.37 (dd,  $J = 8.4, 1.6$  Hz, 1H), 7.70 (d,  $J = 2.0$  Hz, 1H);  $^{13}\text{C}$  NMR (100 MHz,  $\text{CDCl}_3$ )  $\delta$  14.3, 26.3, 28.3, 32.6, 56.6, 60.8, 113.2, 125.1, 126.9, 130.2, 135.5, 139.3, 152.0, 152.5, 168.4; MS (70 eV)  $m/z$  (%) 319 (13) ( $\text{M}^+$ ), 302(100), 285(3), 273(23), 256(6), 244(8), 228(18), 210(10), 199(28), 184(7), 169(12), 153(10); HRMS (ESI) calcd. for  $\text{C}_{17}\text{H}_{22}\text{NO}_5$  [ $\text{M}+\text{H}$ ] $^+$  320.1492, found: 320.1489.

### Ethyl 2-(4-Methoxyphenyl)-2-(4-methylcyclohexylidene)acetate (6k)

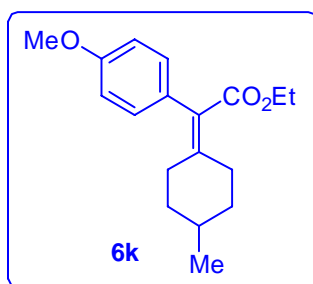

IR (film) 2952, 2923, 2850, 1731, 1607, 1510, 1457, 1244, 1185, 1034, 835  $\text{cm}^{-1}$ ;  $^1\text{H}$  NMR (400 MHz,  $\text{CDCl}_3$ )  $\delta$  0.91 (d,  $J = 6.4$  Hz, 3H), 1.22 (t,  $J = 7.2$  Hz, 3H), 1.57-1.74 (m, 6H), 1.80-1.87 (m, 1H), 2.39-2.42 (m, 1H), 2.90-2.94 (m, 1H), 3.80 (s, 3H), 4.16 (q,  $J = 7.2$  Hz, 2H), 6.86 (d,  $J = 8.4$  Hz, 2H), 7.12 (d,  $J = 8.4$  Hz, 2H);  $^{13}\text{C}$  NMR (100 MHz,  $\text{CDCl}_3$ )  $\delta$  14.3, 21.8, 31.4, 32.1, 32.5, 36.3, 36.4, 55.3, 60.6, 113.6, 127.4, 129.9, 130.6, 140.8, 158.7, 169.7; MS (70 eV)  $m/z$  (%): 288 (100) ( $\text{M}^+$ ), 259(11), 242(89), 213(67), 187(11), 171(39); HRMS (ESI) calcd for  $\text{C}_{18}\text{H}_{24}\text{NaO}_3$  [ $\text{M}+\text{Na}$ ] $^+$

311.1617, found: 311.1616.

### Ethyl 2-(4-*tert*-Butylcyclohexylidene)-2-(4-methoxyphenyl)acetate (**6l**)

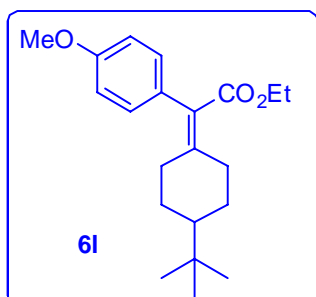

IR (film) 2949, 2968, 2087, 1681, 1366, 1291, 1084, 1058, 747  $\text{cm}^{-1}$ ;  $^1\text{H}$  NMR (400 MHz,  $\text{CDCl}_3$ )  $\delta$  0.85 (s, 9H), 1.21-1.25 (m, 4H), 1.75-2.03 (m, 6H), 2.46-2.50 (m, 1H), 3.01-3.04 (m, 1H), 2.90-2.94 (m, 1H), 3.80 (s, 3H), 4.16 (q,  $J = 7.2$  Hz, 2H), 6.86 (d,  $J = 8.4$  Hz, 2H), 7.12 (d,  $J = 8.4$  Hz, 2H);  $^{13}\text{C}$  NMR (100 MHz,  $\text{CDCl}_3$ )  $\delta$  14.3, 27.7, 28.9, 29.0, 31.9, 32.5, 32.6, 41.8, 55.3, 60.6, 113.6, 127.0, 129.9, 130.7, 148.6, 158.6, 169.7; MS (70 eV)  $m/z$  (%): 330 (100) ( $\text{M}^+$ ), 315(2), 301(5), 284(95), 269(5), 256(21), 241(11), 227(22), 199(89), 185(18), 172(19); HRMS (ESI) calcd for  $\text{C}_{21}\text{H}_{31}\text{O}_3$  [( $\text{M}+\text{H}$ ) $^+$ ] 331.2267, found: 331.2266.

### Ethyl 2-(4-Methoxyphenyl)-2-(4-phenylcyclohexylidene)acetate (**6m**)

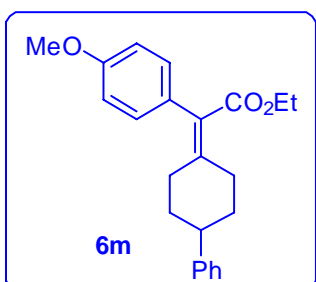

IR (film) 2952, 2923, 2850, 1713, 1607, 1510, 1457, 1244, 1185, 1034, 835  $\text{cm}^{-1}$ ;  $^1\text{H}$  NMR (400 MHz,  $\text{CDCl}_3$ )  $\delta$  1.24 (t,  $J = 7.2$  Hz, 3H), 1.53-1.59 (m, 1H), 1.71-1.75 (m, 1H), 1.93-2.10 (m, 4H), 2.68-2.80 (m, 2H), 3.09-3.12 (m, 1H), 3.81 (s, 3H), 4.18 (q,  $J = 7.2$  Hz, 2H), 6.88 (d,  $J = 8.4$  Hz, 2H), 7.16-7.22 (m, 5H), 7.27-7.31 (m, 2H);  $^{13}\text{C}$  NMR (100 MHz,  $\text{CDCl}_3$ )  $\delta$  14.3, 31.8, 32.5, 35.3, 35.4, 44.4, 55.3, 60.7, 113.7, 126.2, 126.9, 128.5, 128.7, 129.6, 130.6, 146.3, 146.8, 158.8, 169.6; MS (70 eV)  $m/z$  (%): 350 (100) ( $\text{M}^+$ ), 304(39), 277(22), 194(21), 173(41), 159(22); HRMS (ESI) calcd for  $\text{C}_{23}\text{H}_{26}\text{NaO}_3$  [( $\text{M}+\text{Na}$ ) $^+$ ] 373.1774, found: 373.1779.

### Ethyl 3-Ethyl-2-(4-methoxyphenyl)pent-2-enoate (**6n**)

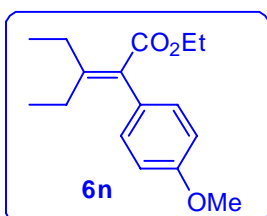

IR (film) 2966, 2917, 1712, 1607, 1509, 1244, 1204, 1105, 1032, 836, 808  $\text{cm}^{-1}$ ;  $^1\text{H}$  NMR (400 MHz,  $\text{CDCl}_3$ )  $\delta$  0.94 (t,  $J = 7.6$  Hz, 3H), 1.13 (t,  $J = 7.2$  Hz, 3H), 1.21 (t,  $J = 7.2$  Hz, 3H), 2.01 (q,  $J = 7.2$  Hz, 2H), 2.40 (q,  $J = 7.2$  Hz, 2H), 3.80 (s, 3H), 4.14 (q,  $J = 7.2$  Hz, 2H), 6.88 (d,  $J = 8.4$  Hz, 2H), 7.12 (d,  $J = 8.4$  Hz, 2H);  $^{13}\text{C}$  NMR (100 MHz,  $\text{CDCl}_3$ )  $\delta$  12.9, 13.4, 14.3, 25.6, 25.8, 55.3, 60.4, 113.6, 127.8, 129.6, 130.5, 152.9, 158.6, 169.3; MS (70 eV)  $m/z$  (%):



262 (100) ( $M^+$ ), 233(16), 216(83), 205(19), 197(83), 187(83), 173(56), 159(83); HRMS (ESI) calcd for  $C_{16}H_{23}O_3$  [ $(M+H)^+$ ] 263.1641, found: 263.1637.

**Ethyl 2-(4-Methoxyphenyl)-3-methylpent-2-enoate (6o, *E/Z* isomers *E:Z*=1:2.5)**

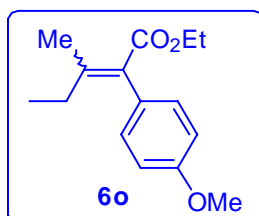

IR (film) 2929, 1711, 1607, 1510, 1245, 1208, 1100, 1031, 836, 733  $cm^{-1}$ ;  $^1H$  NMR (400 MHz,  $CDCl_3$ )  $\delta$  1.14 (t,  $J = 7.6$  Hz, 3H), 1.22 (t,  $J = 7.2$  Hz, 3H), 1.68 (s, 3H), 2.38 (q,  $J = 7.2$  Hz, 2H), 3.81 (s, 3H), 4.14 (q,  $J = 7.2$  Hz, 2H), 6.88 (d,  $J = 8.4$  Hz, 2H), 7.12 (d,  $J = 8.4$  Hz, 2H);  $^{13}C$  NMR (100 MHz,  $CDCl_3$ )  $\delta$  12.6, 13.1, 14.3, 19.6, 19.9, 29.1, 29.4, 55.3, 60.51, 60.54, 113.6, 129.7, 130.4, 130.5, 130.6, 147.4, 148.4, 158.6, 169.3; MS (70 eV)  $m/z$  (%): 248 (100) ( $M^+$ ), 219(6), 202(62), 191(23), 173(95), 159(72); HRMS (ESI) calcd for  $C_{15}H_{21}O_3$  [ $(M+H)^+$ ] 249.1485, found: 249.1481.

**References**

- 1 A. Padwa, Y. S. Kulkarni and Z. Zhang, *J. Org. Chem.*, **1990**, *55*, 4144.
- 2 R. Pellicciari, B. Natalini, B. M. Sadeghpour, M. Marinozzi, J. P. Snyder, B. L. Williamson, J. T. Kuethe and A. Padwa, *J. Am. Chem. Soc.*, **1996**, *118*, 1.
- 3 K. Nagao, M. Chiba, S. -W. Kim, *Synthesis*, **1983**, *3*, 197.

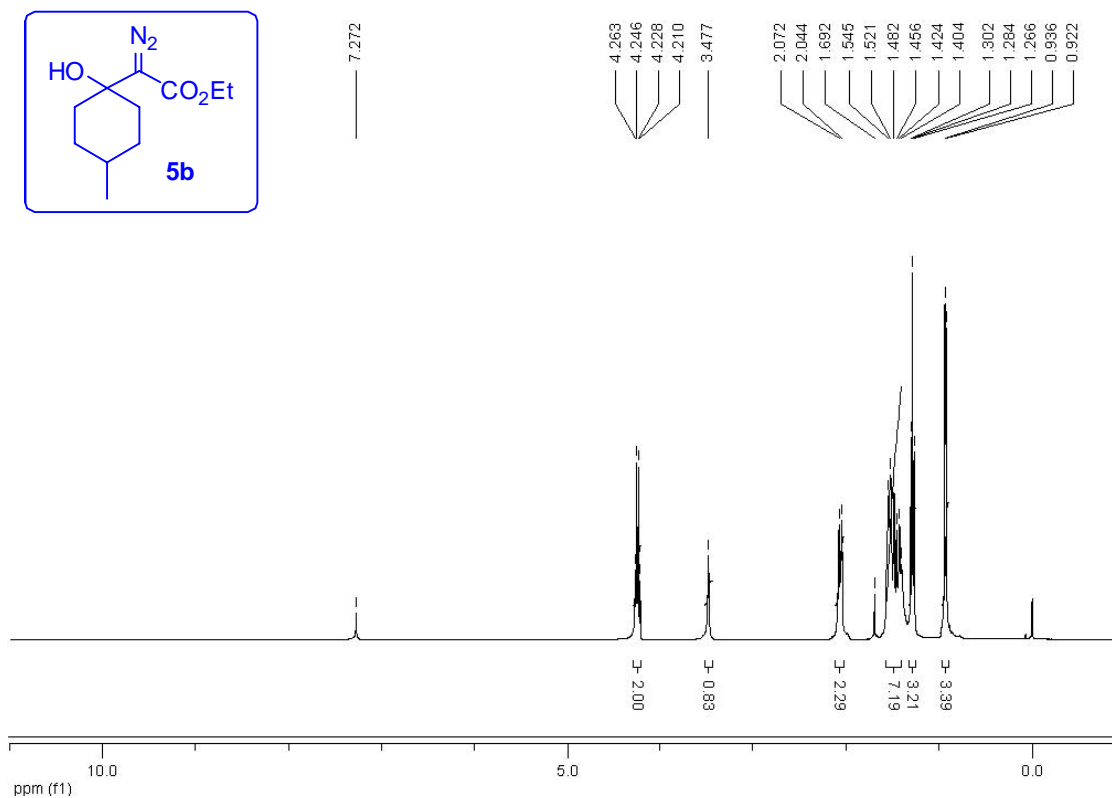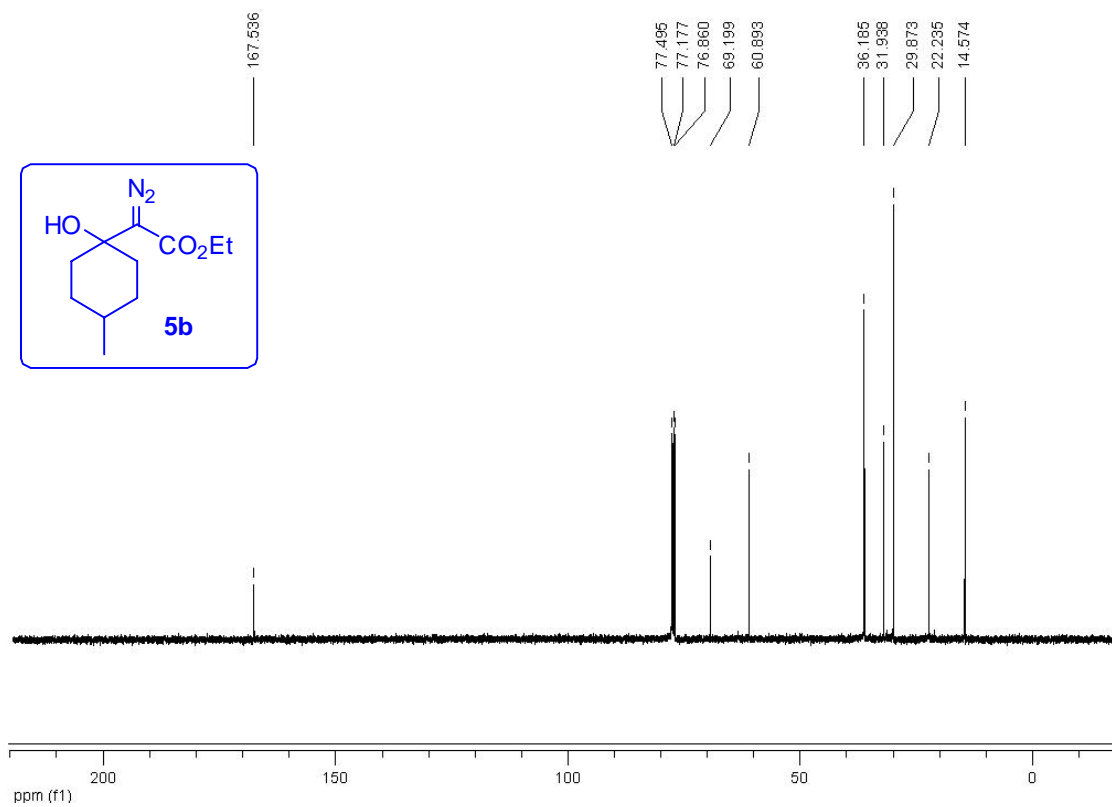

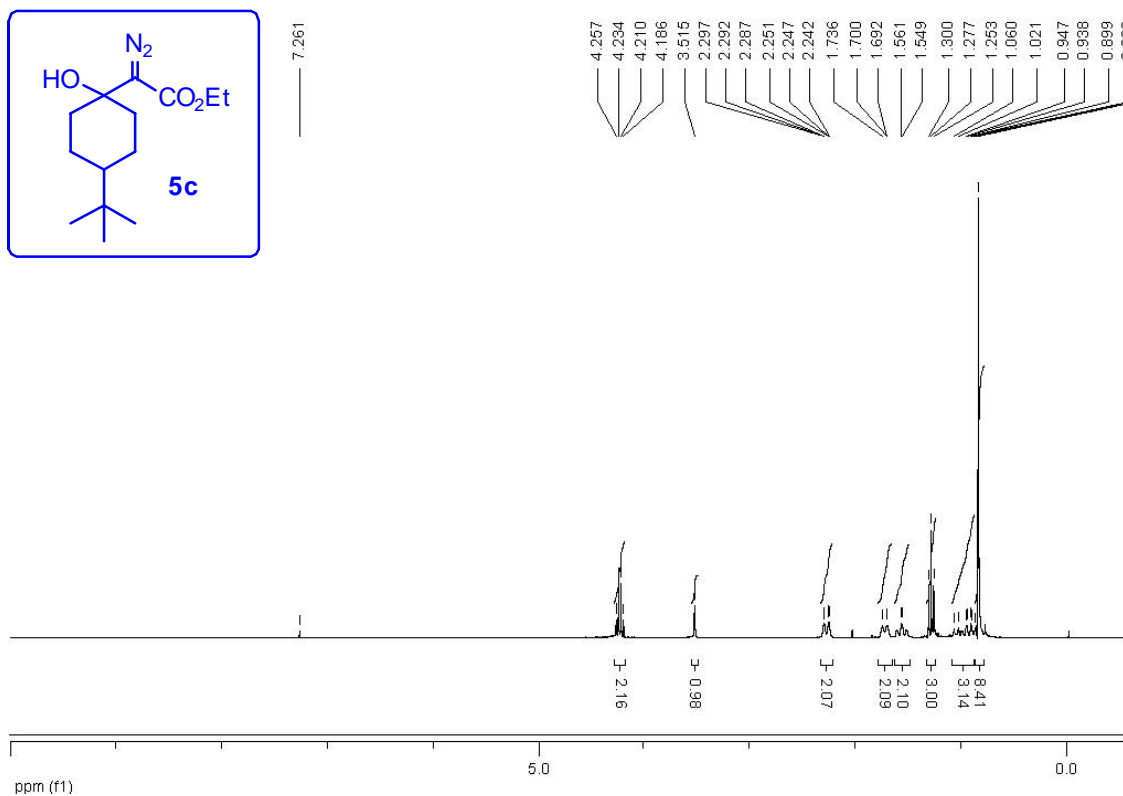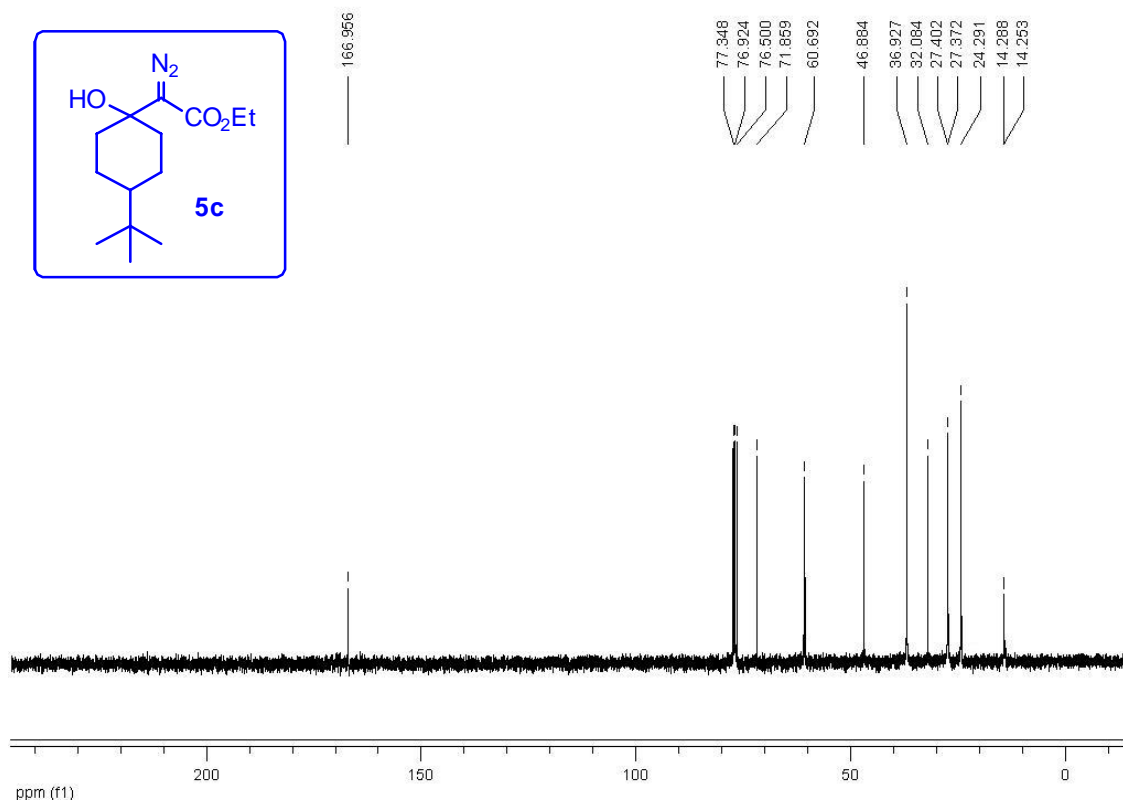

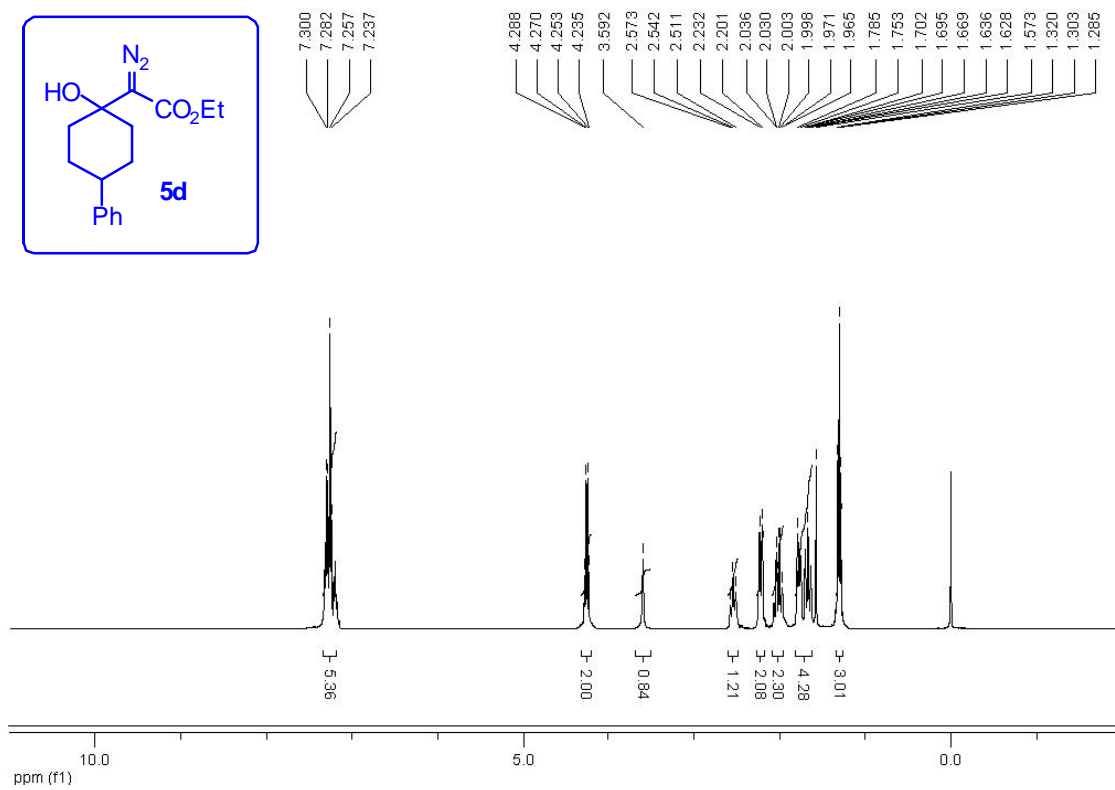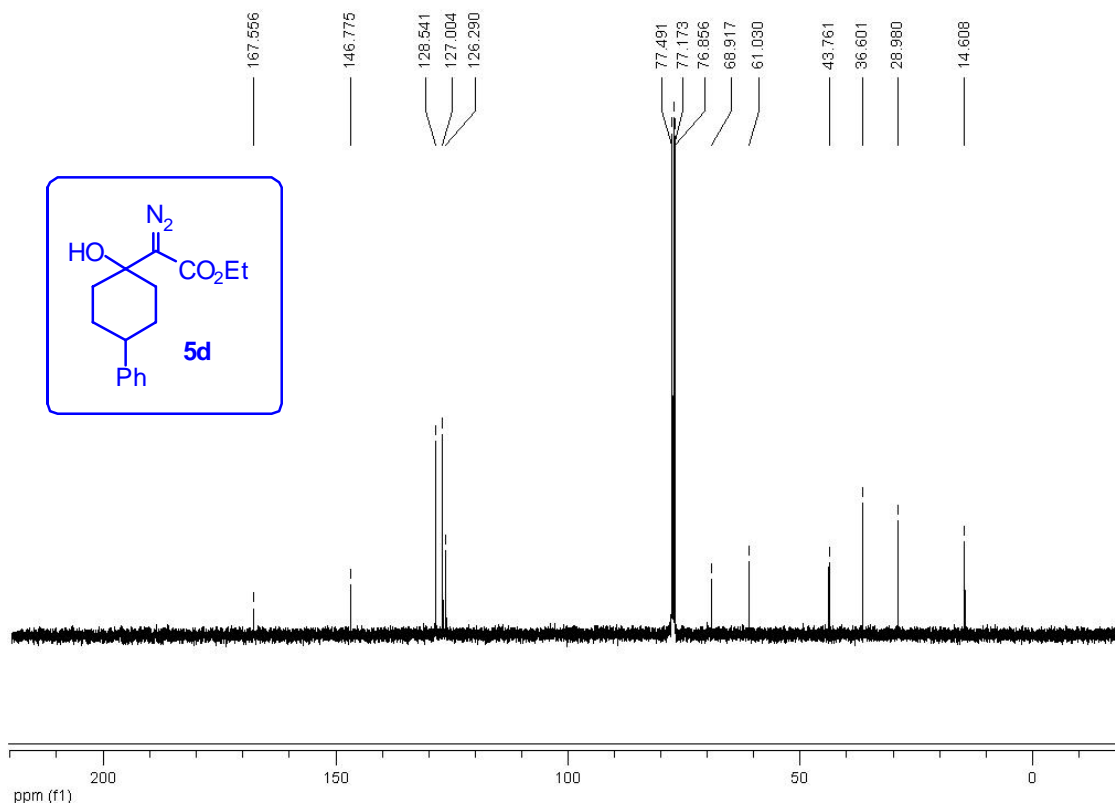

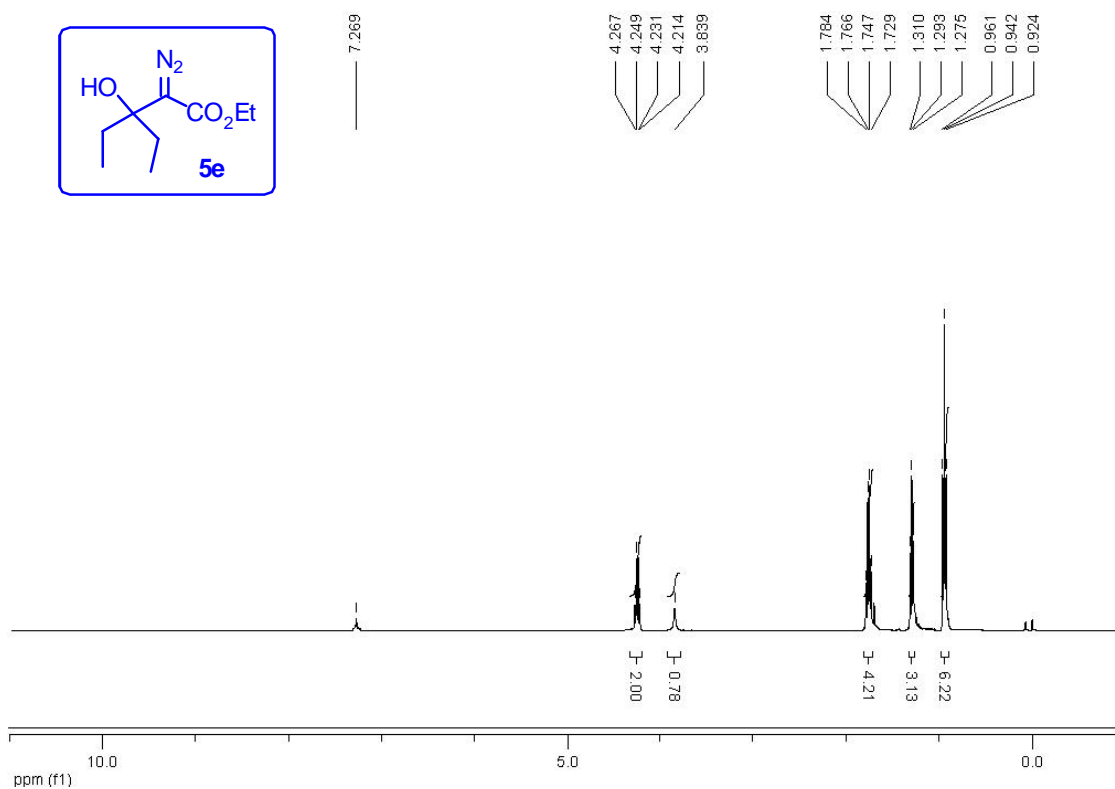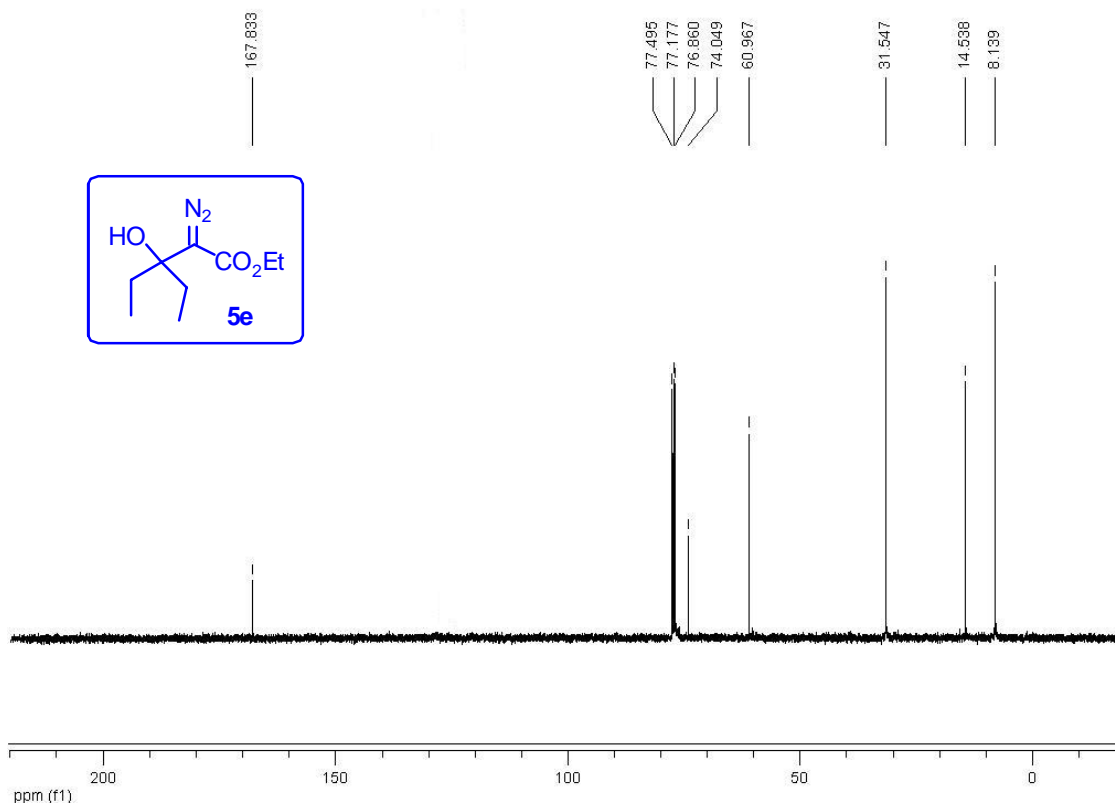

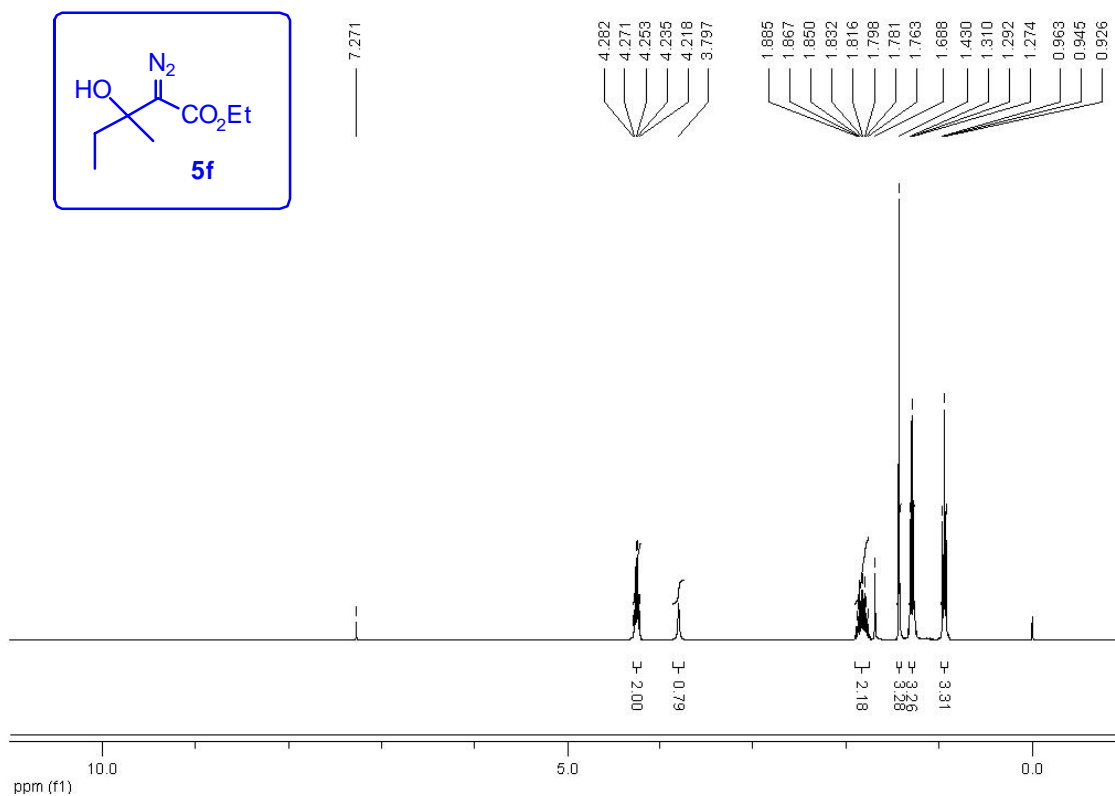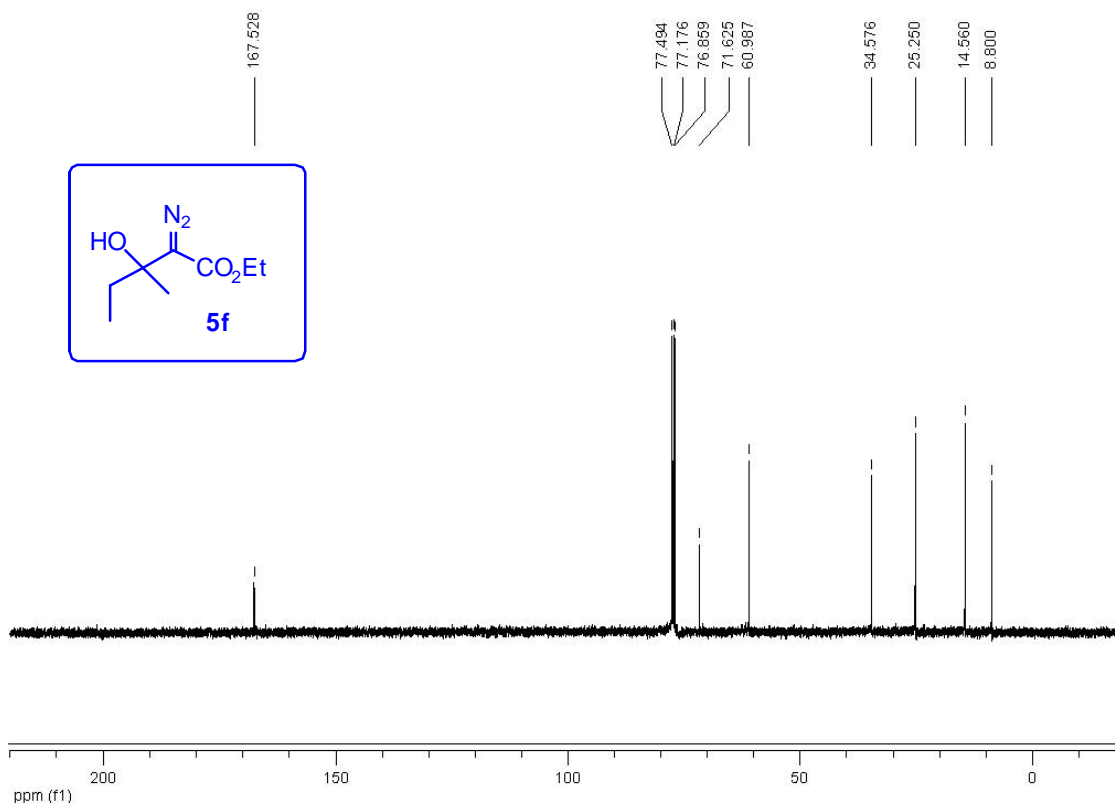

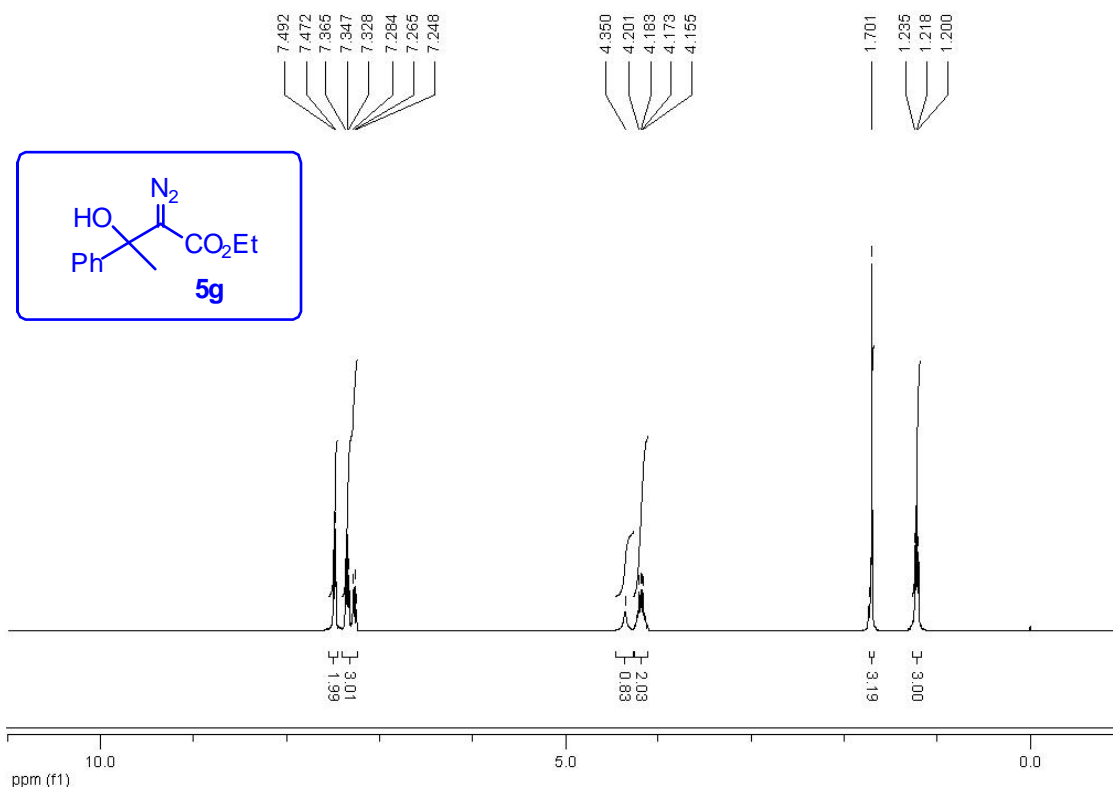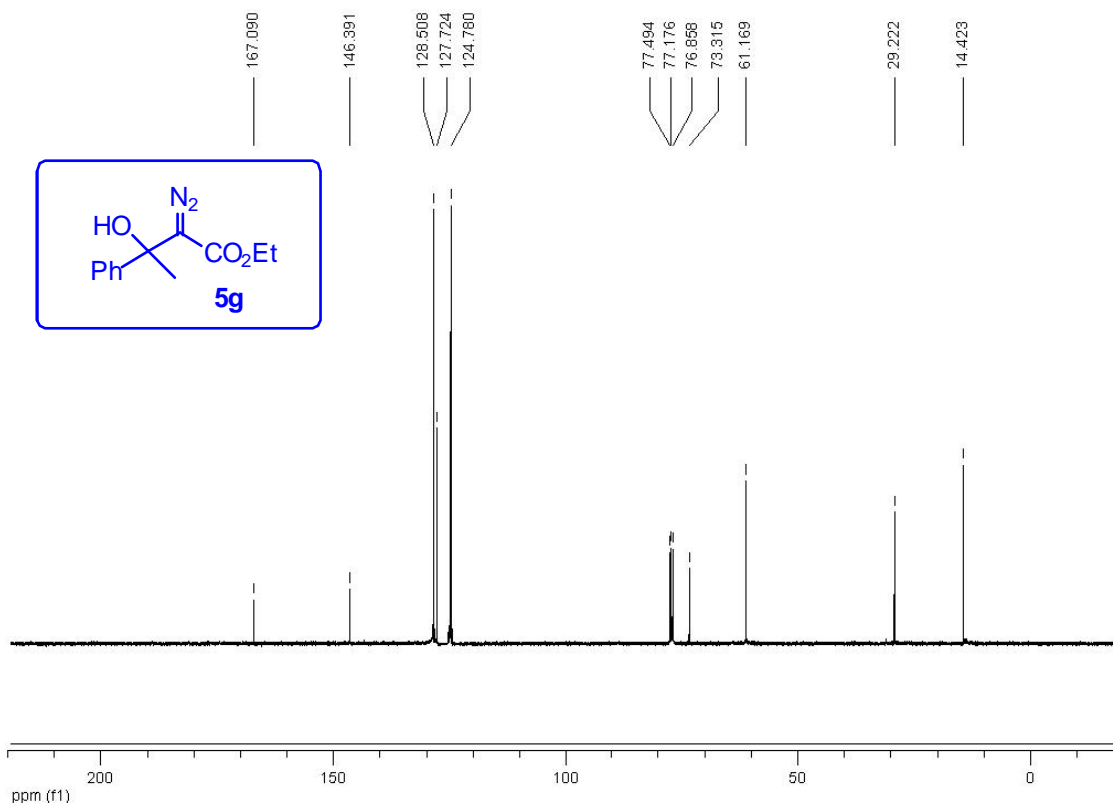

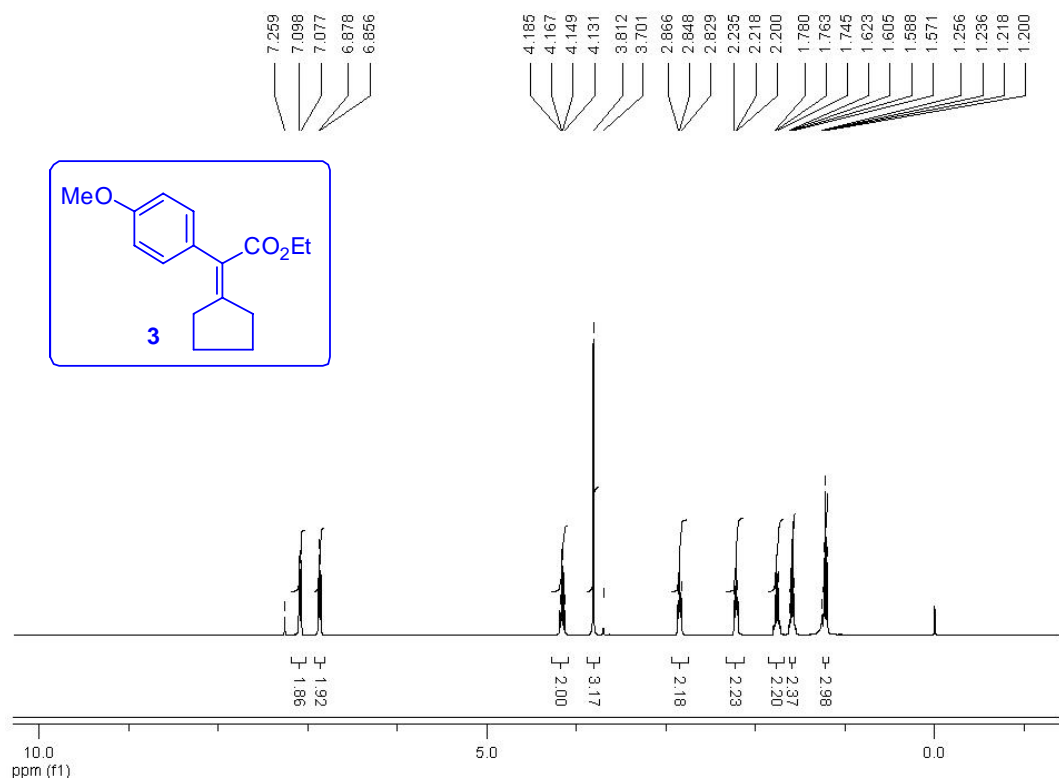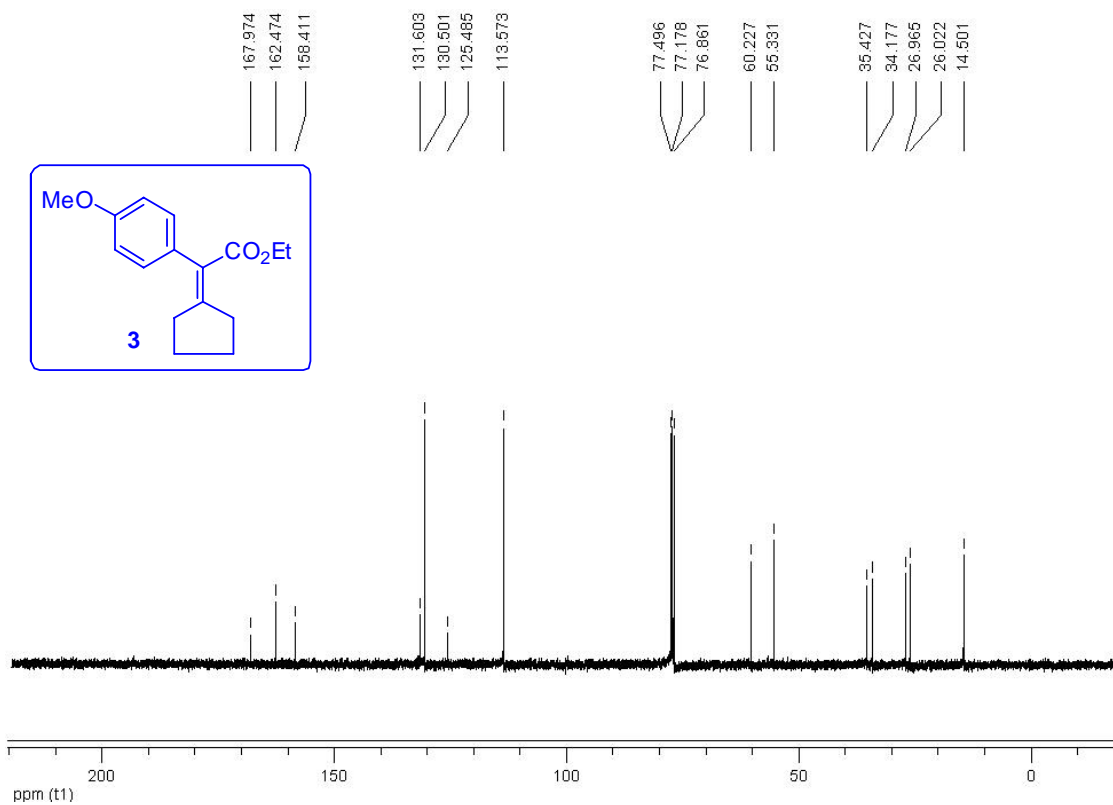



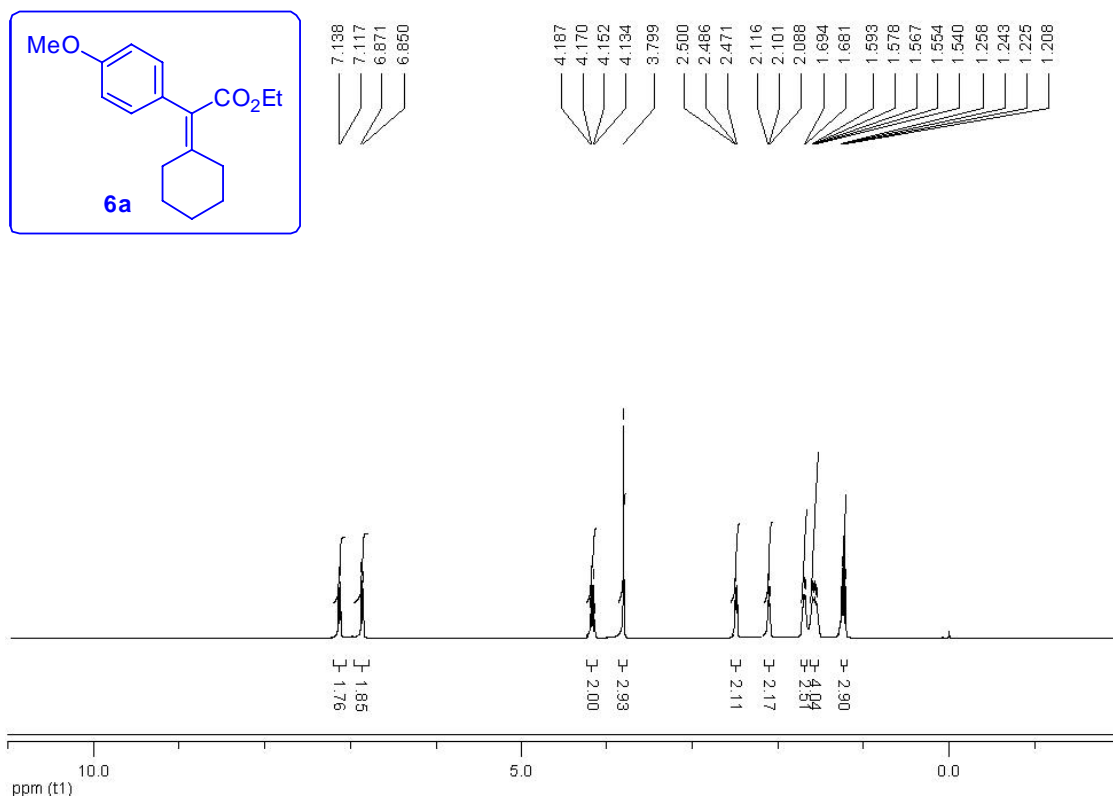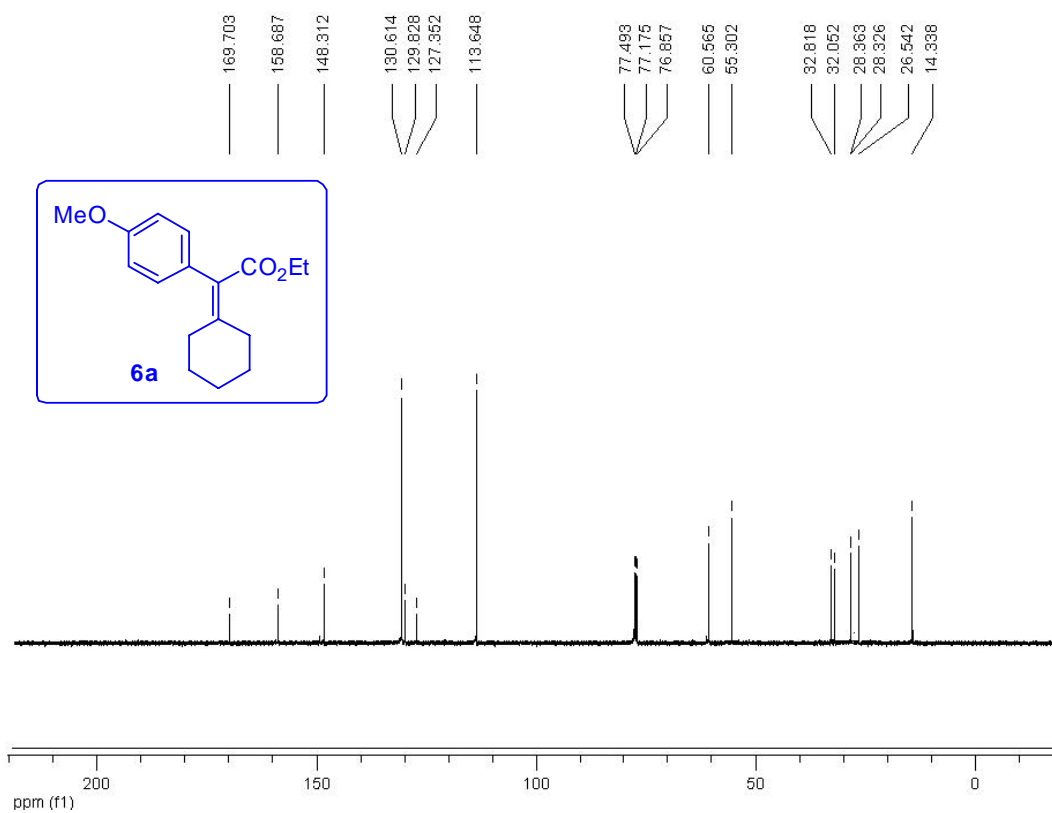

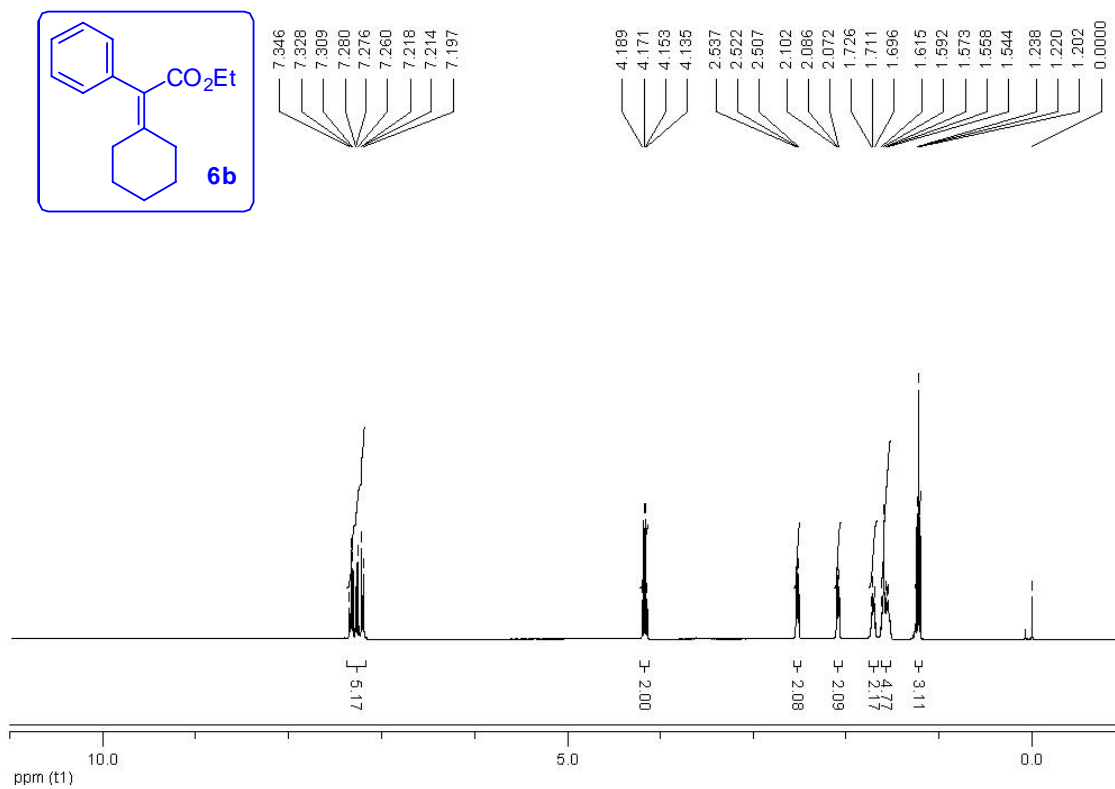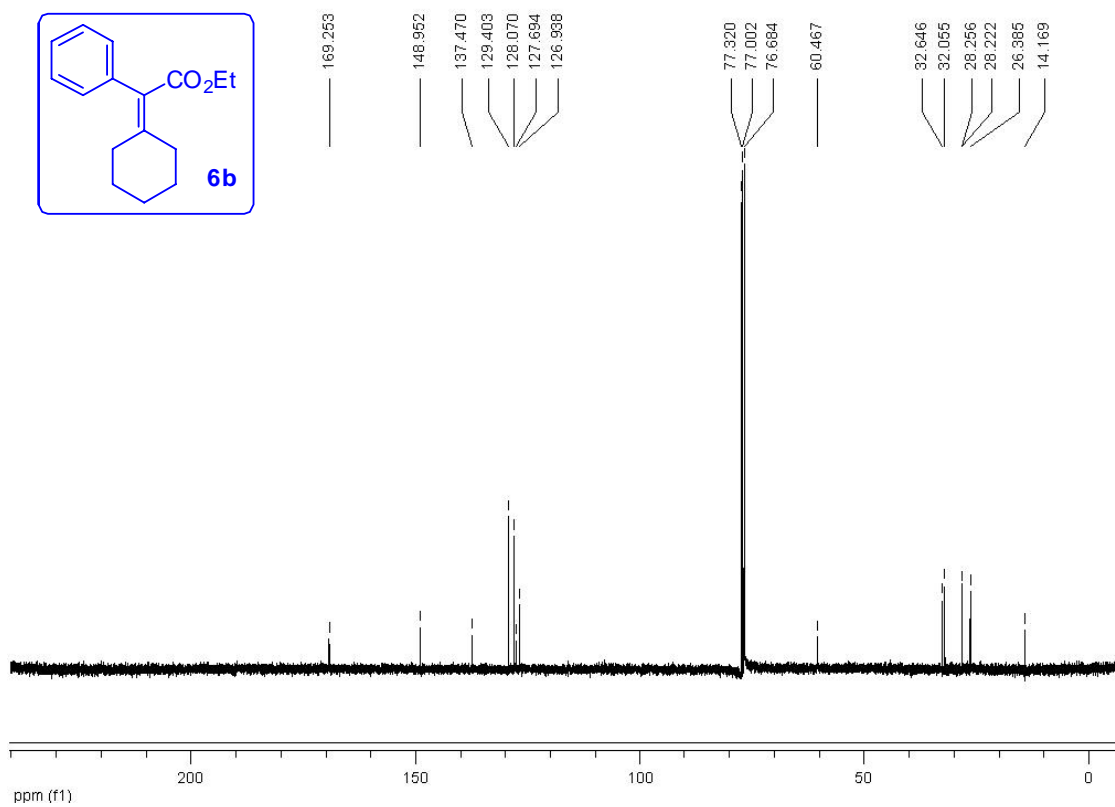

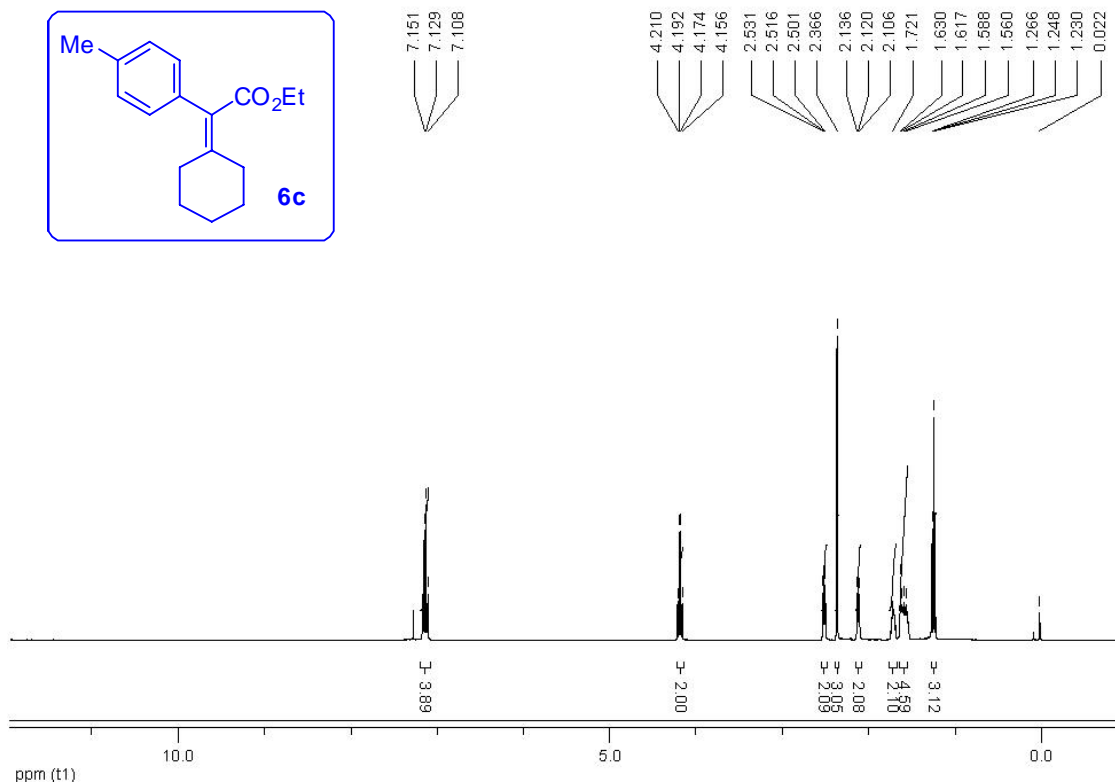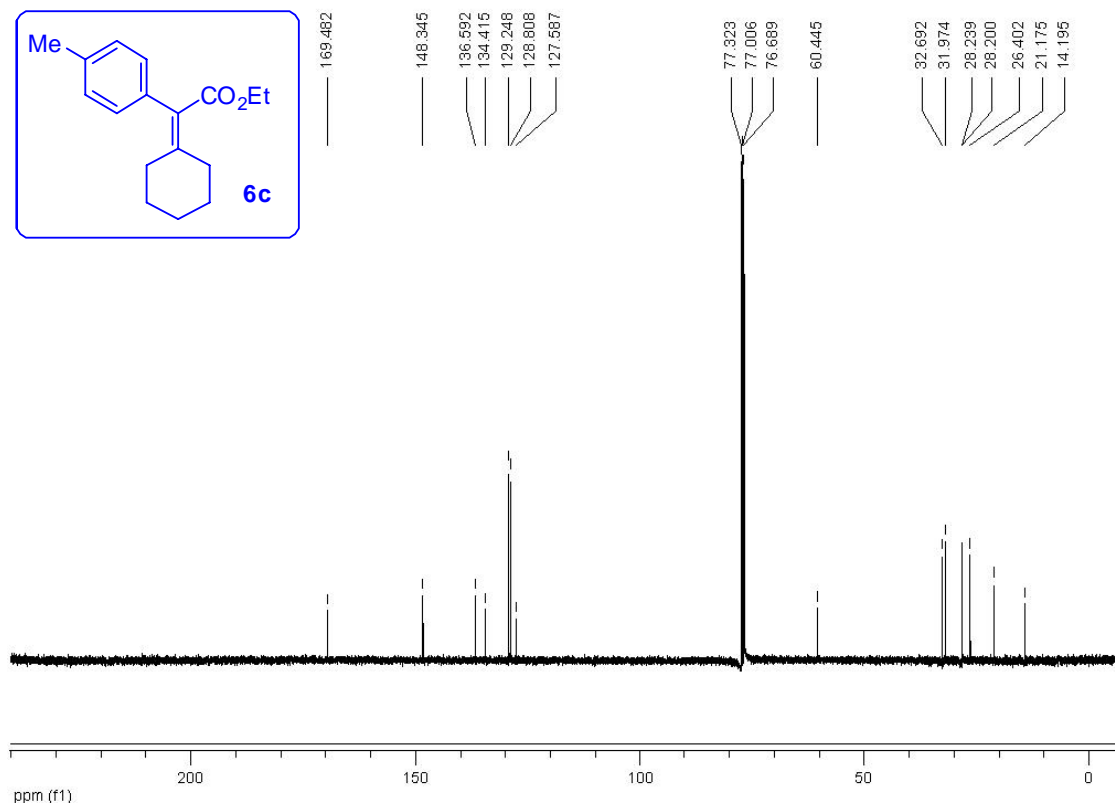

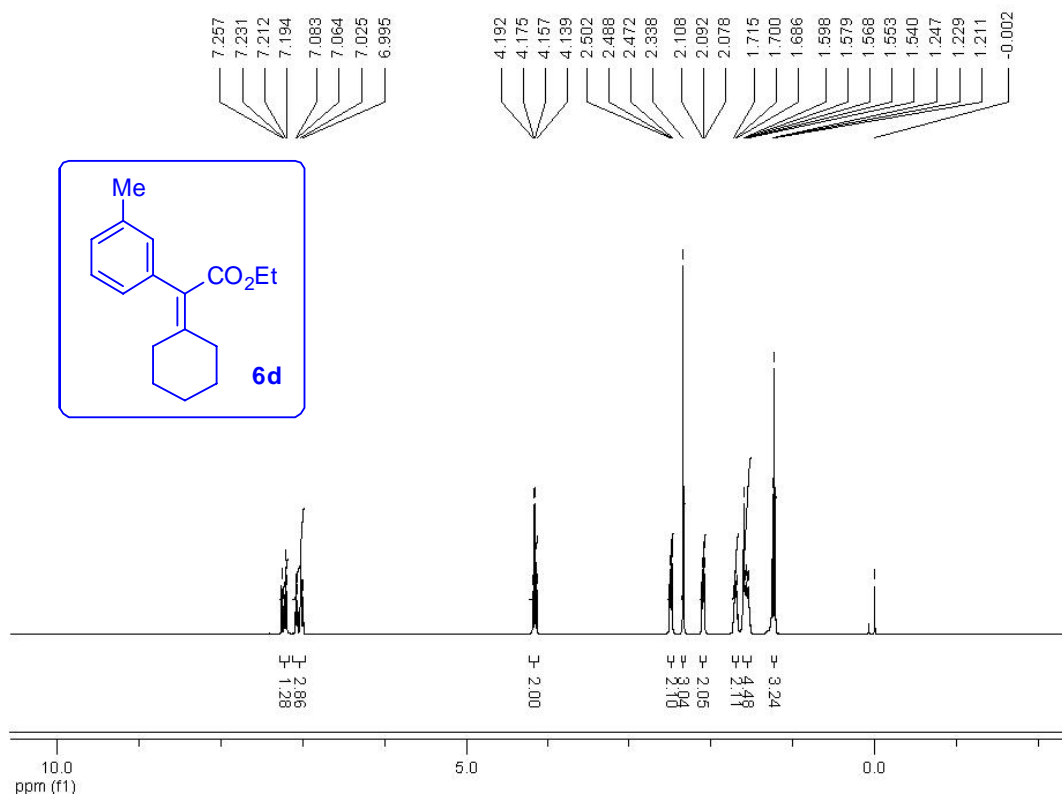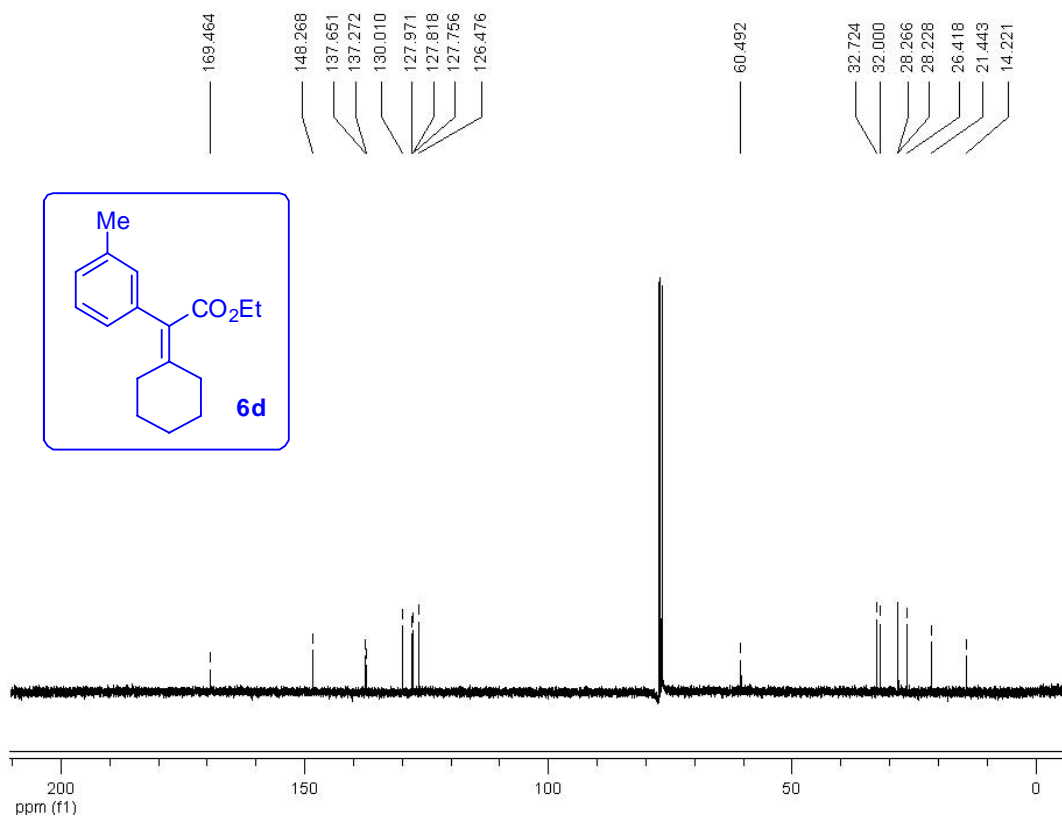

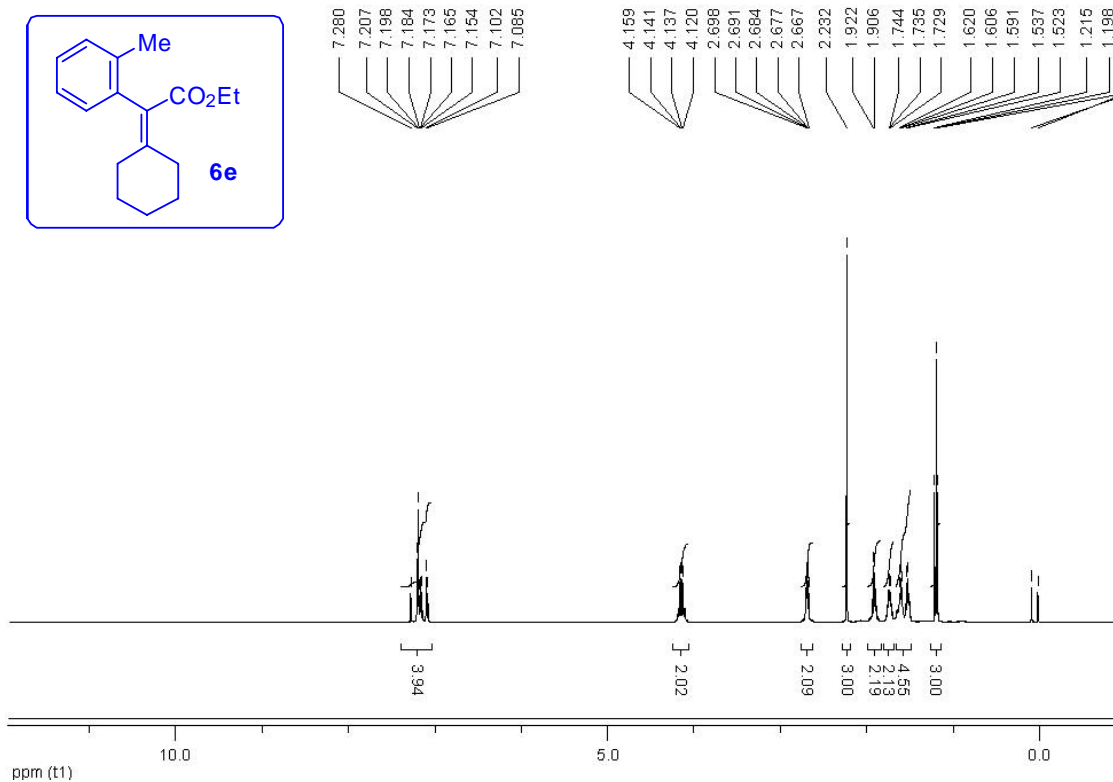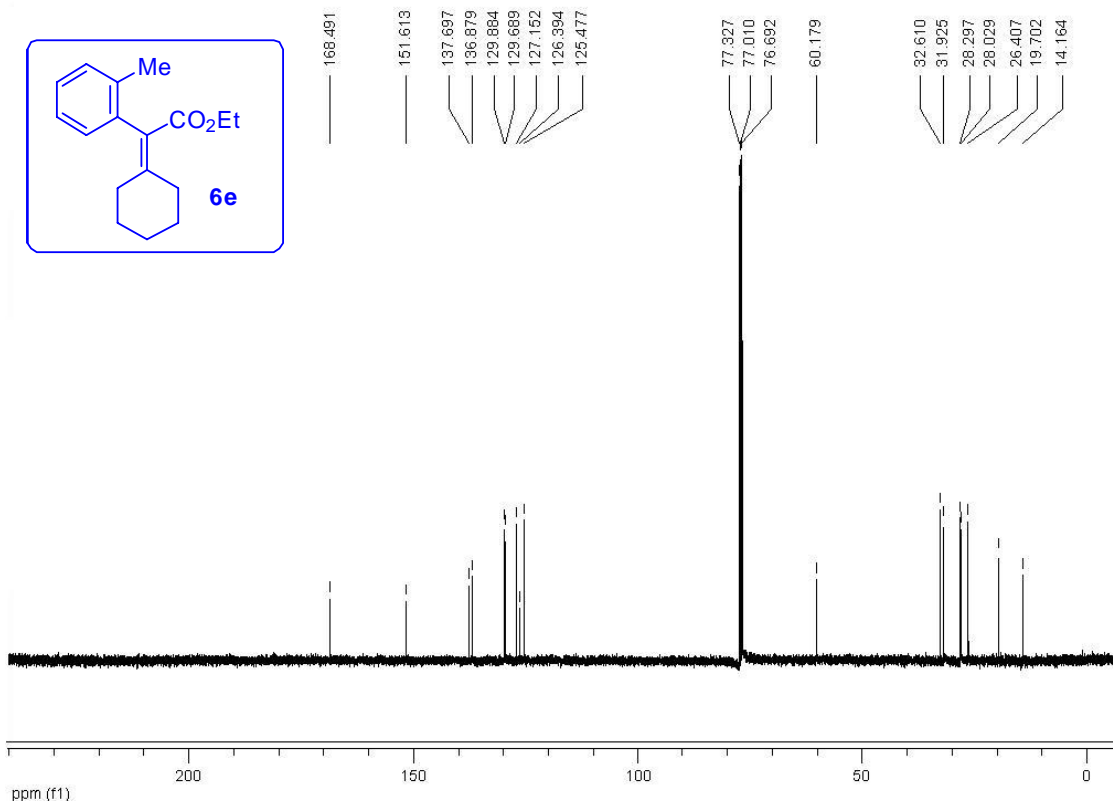

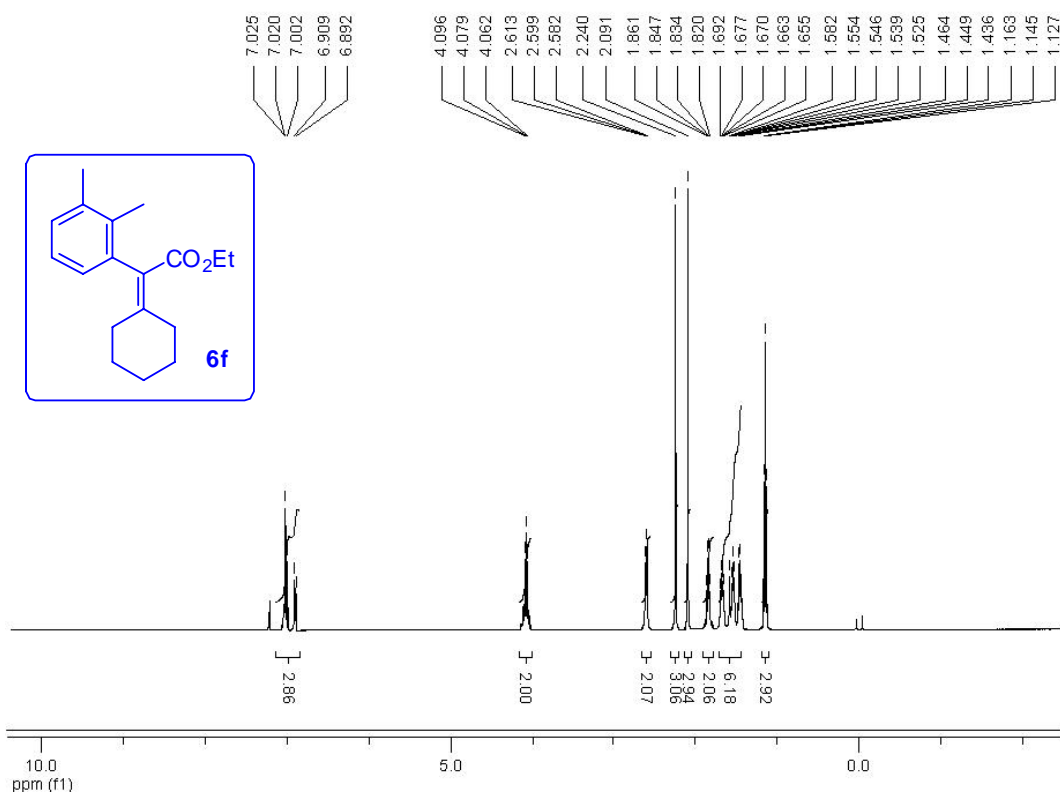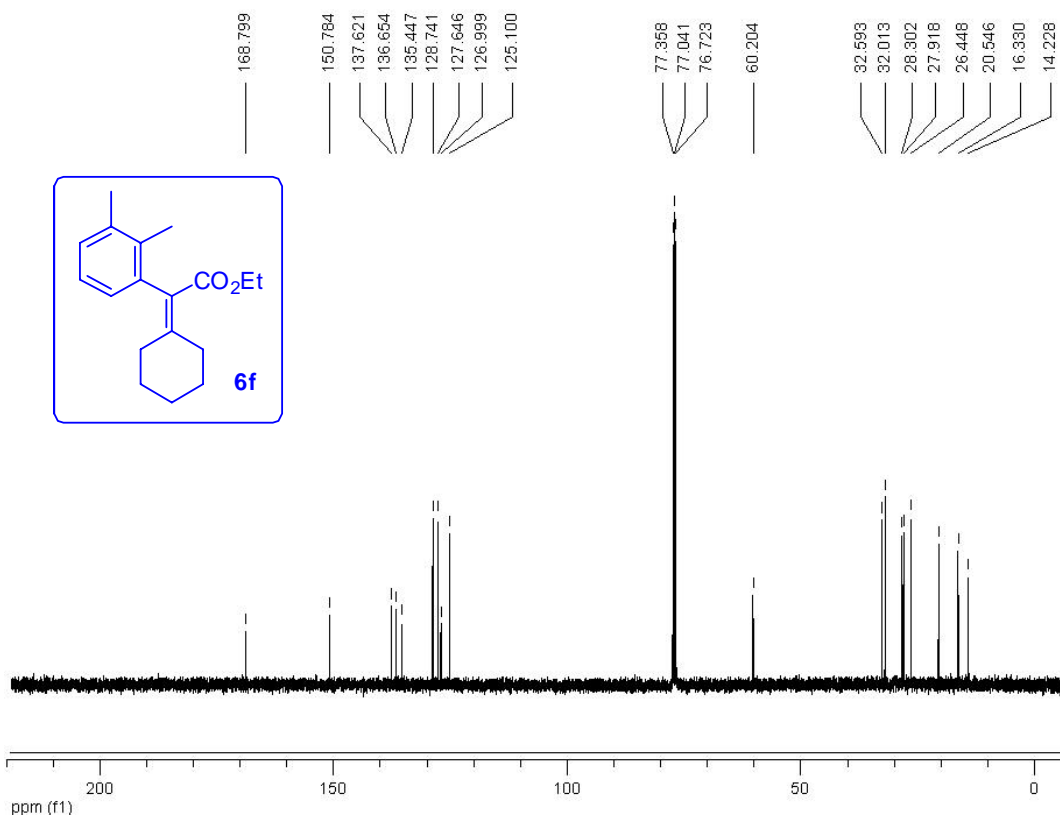

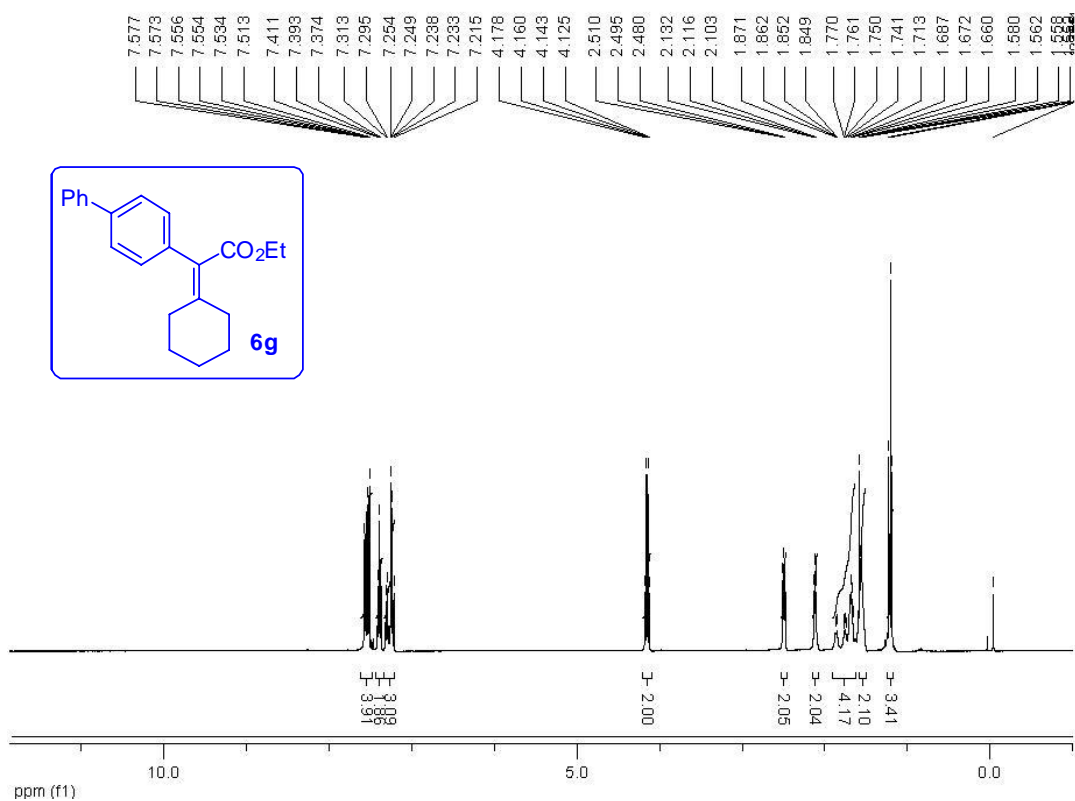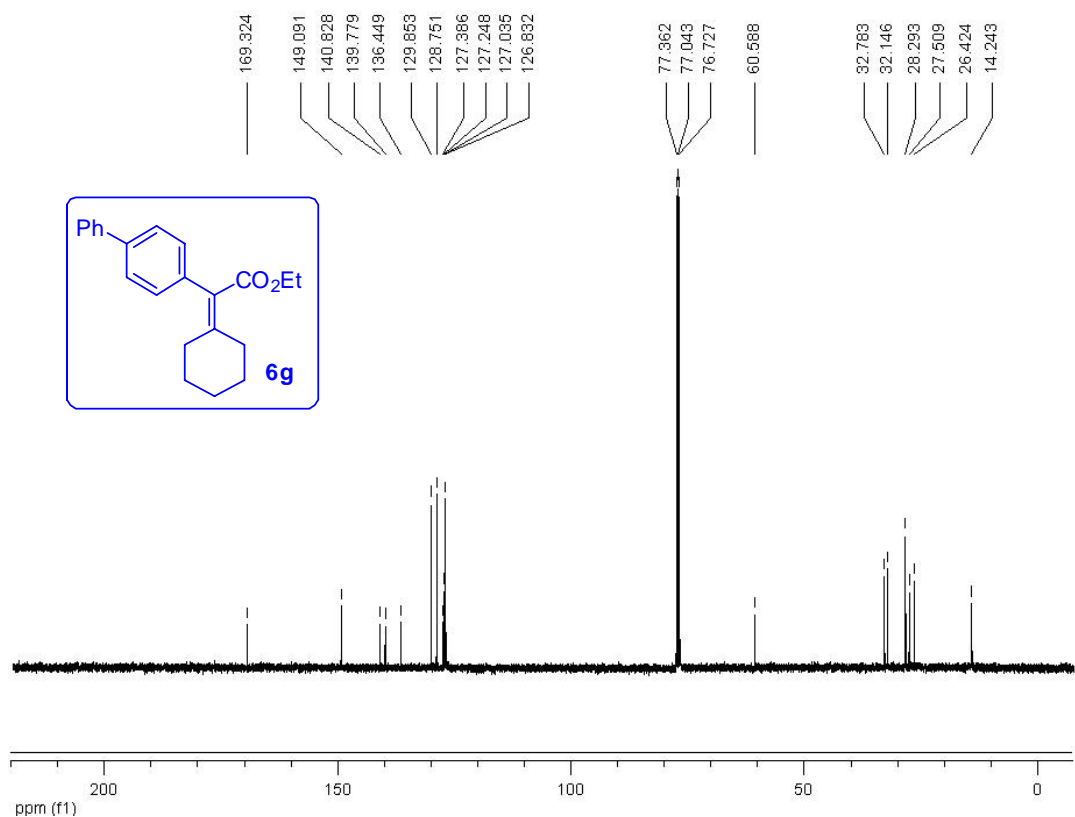

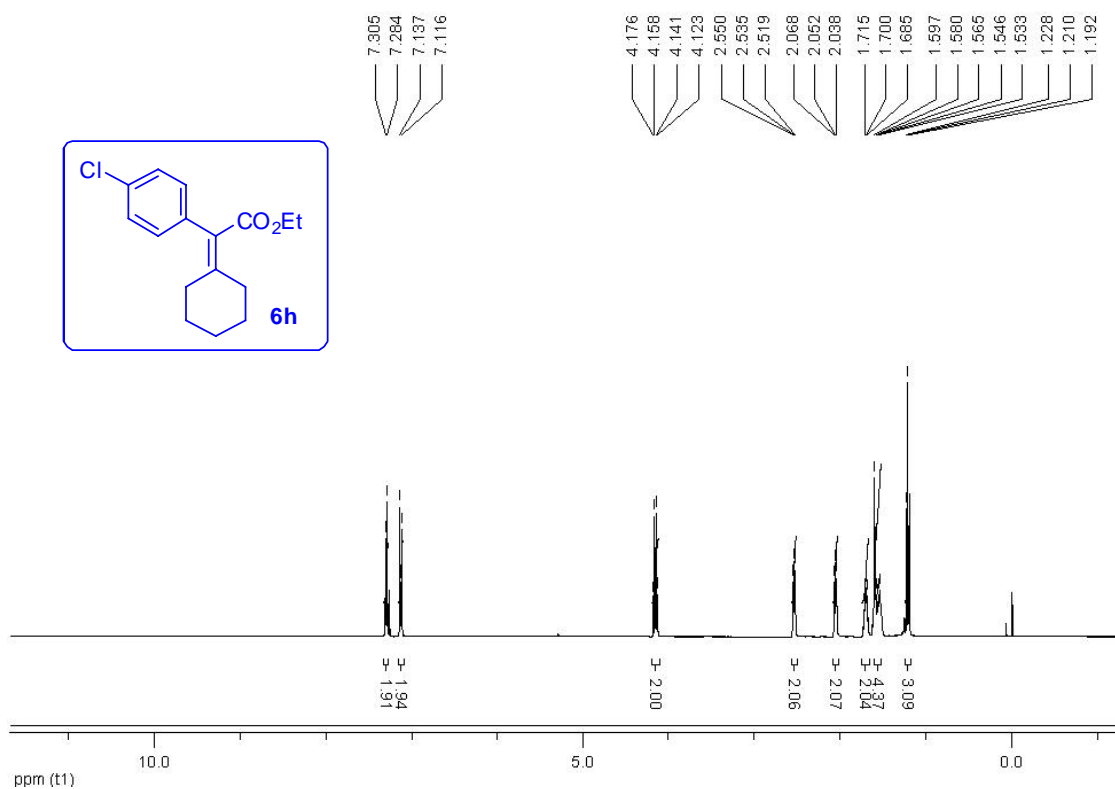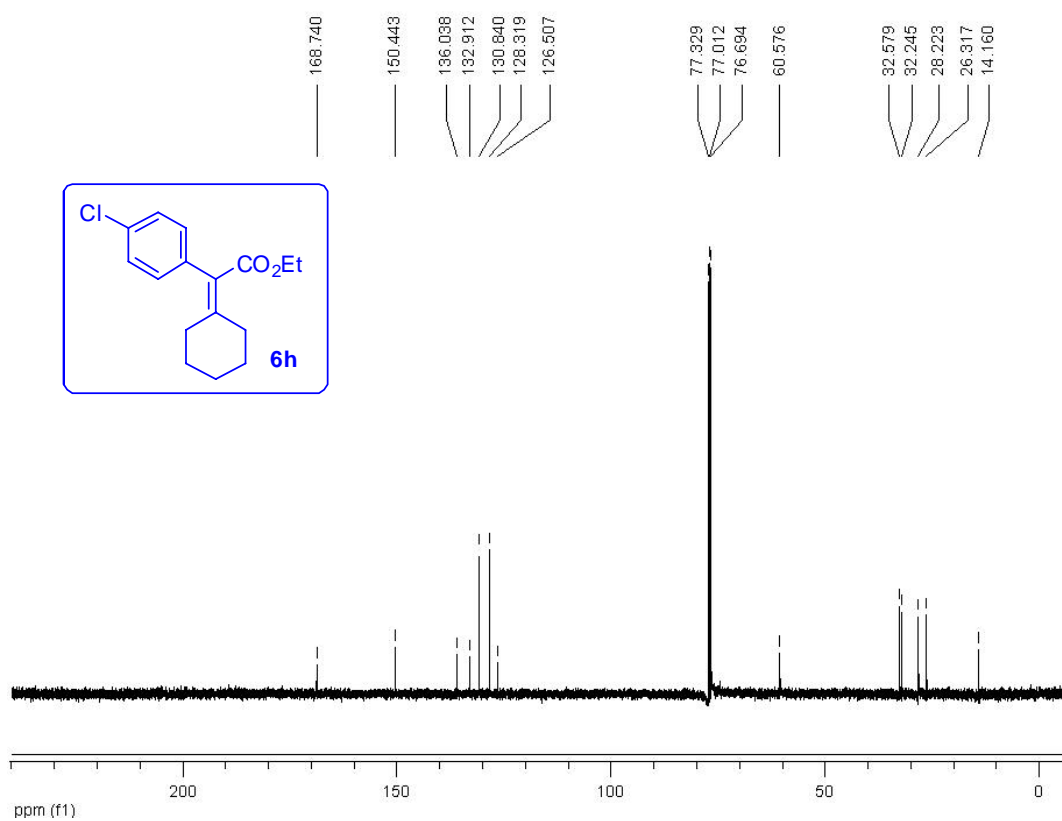



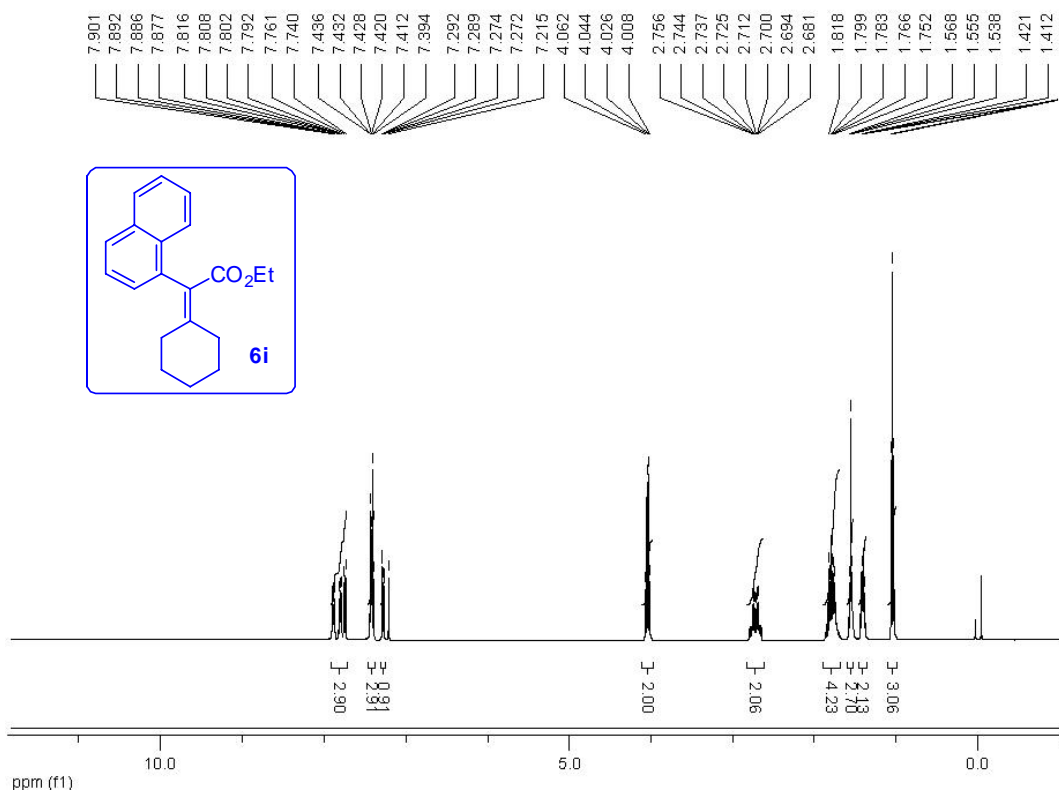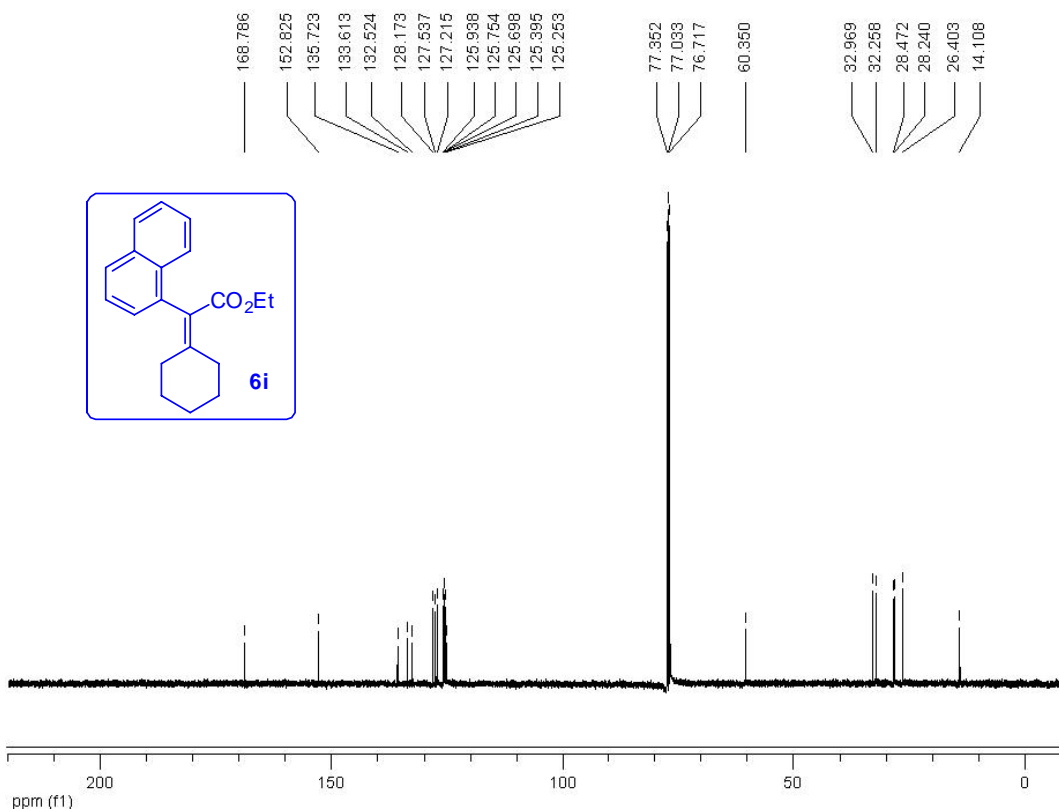

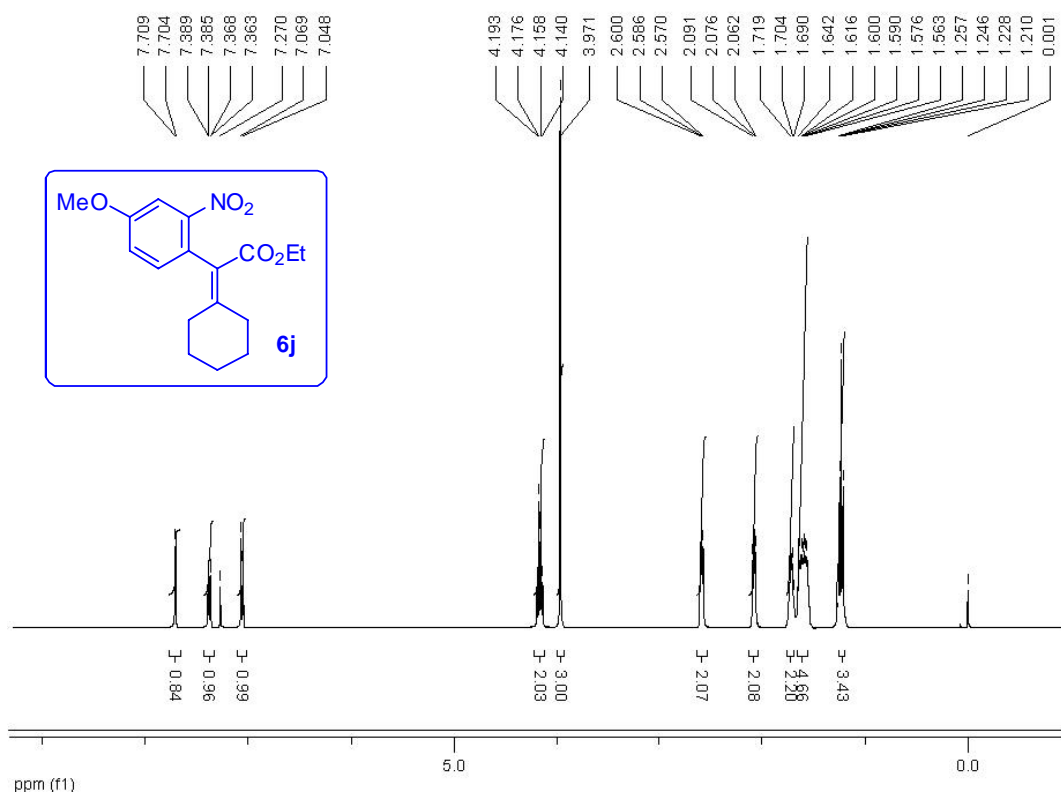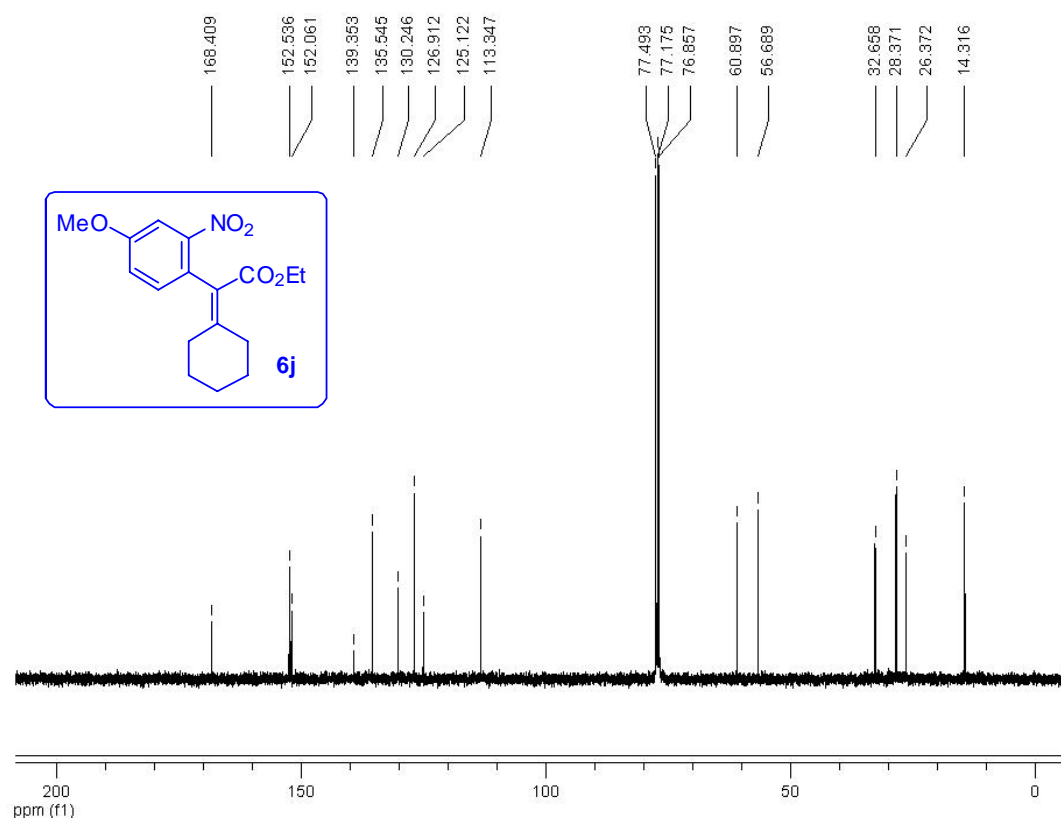

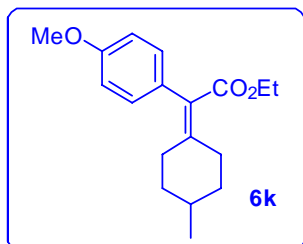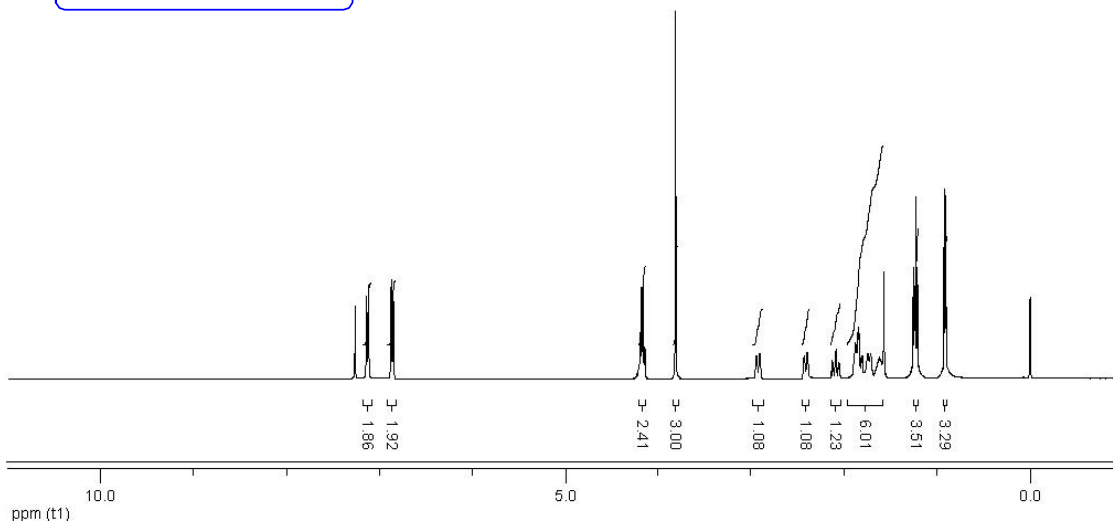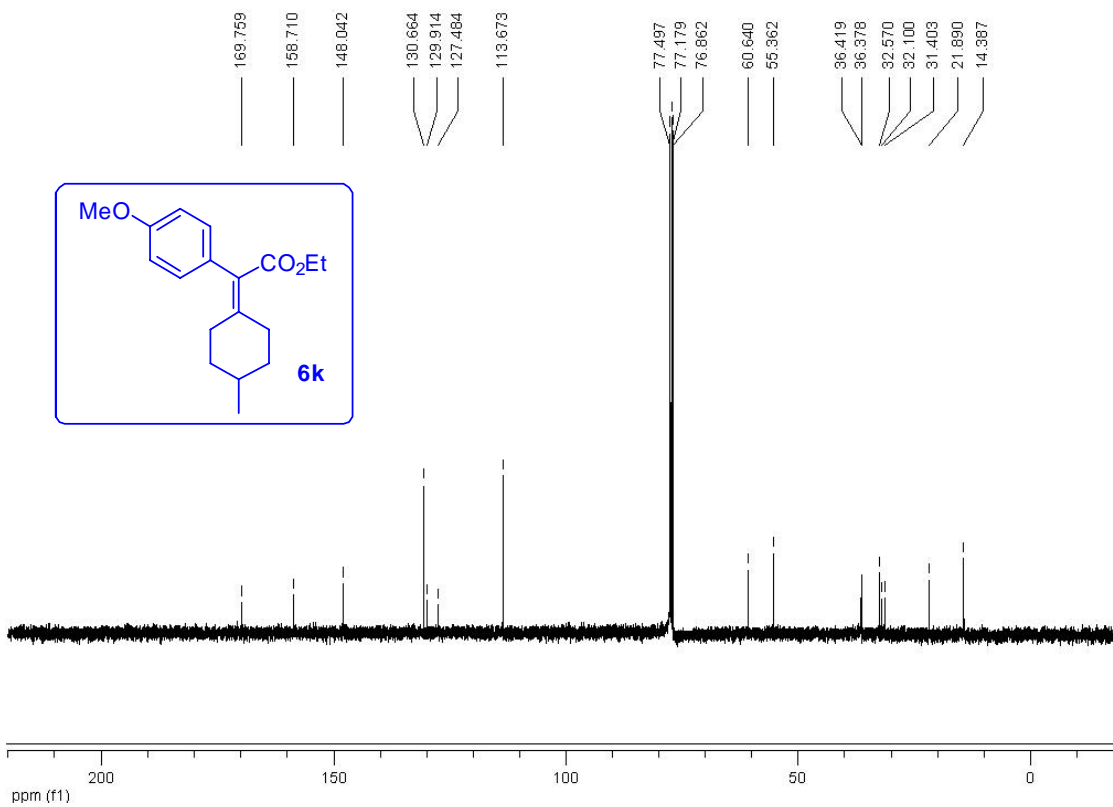

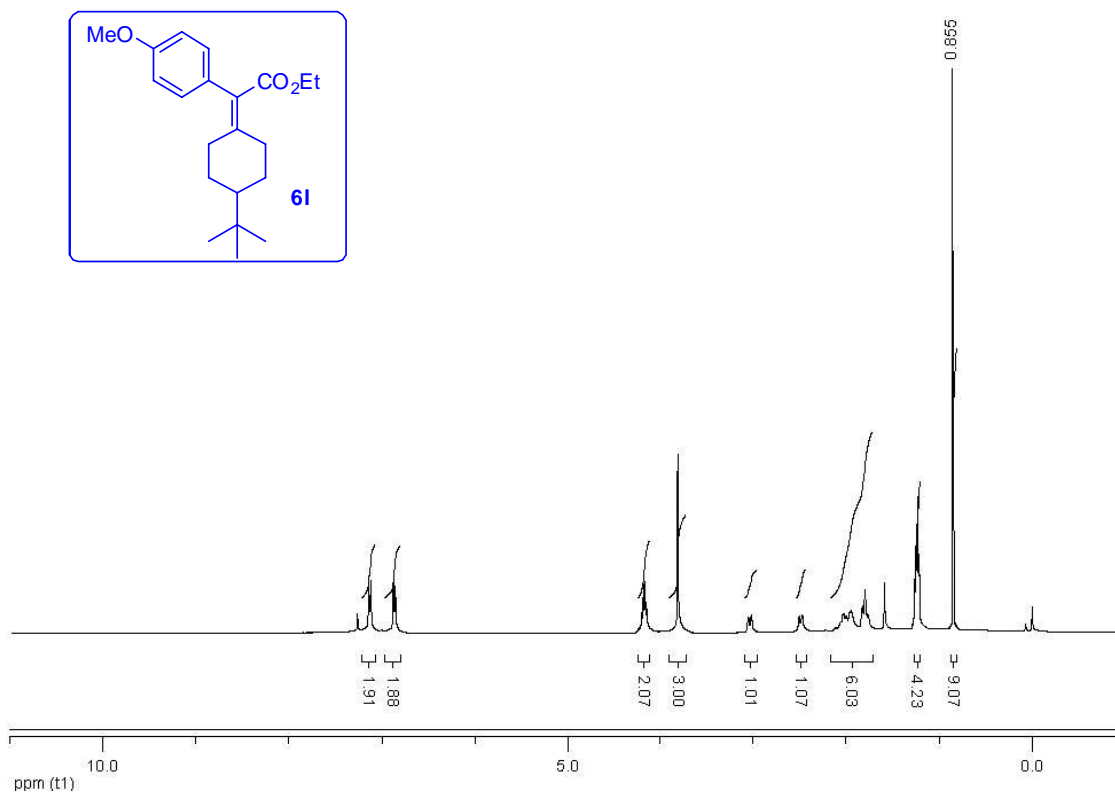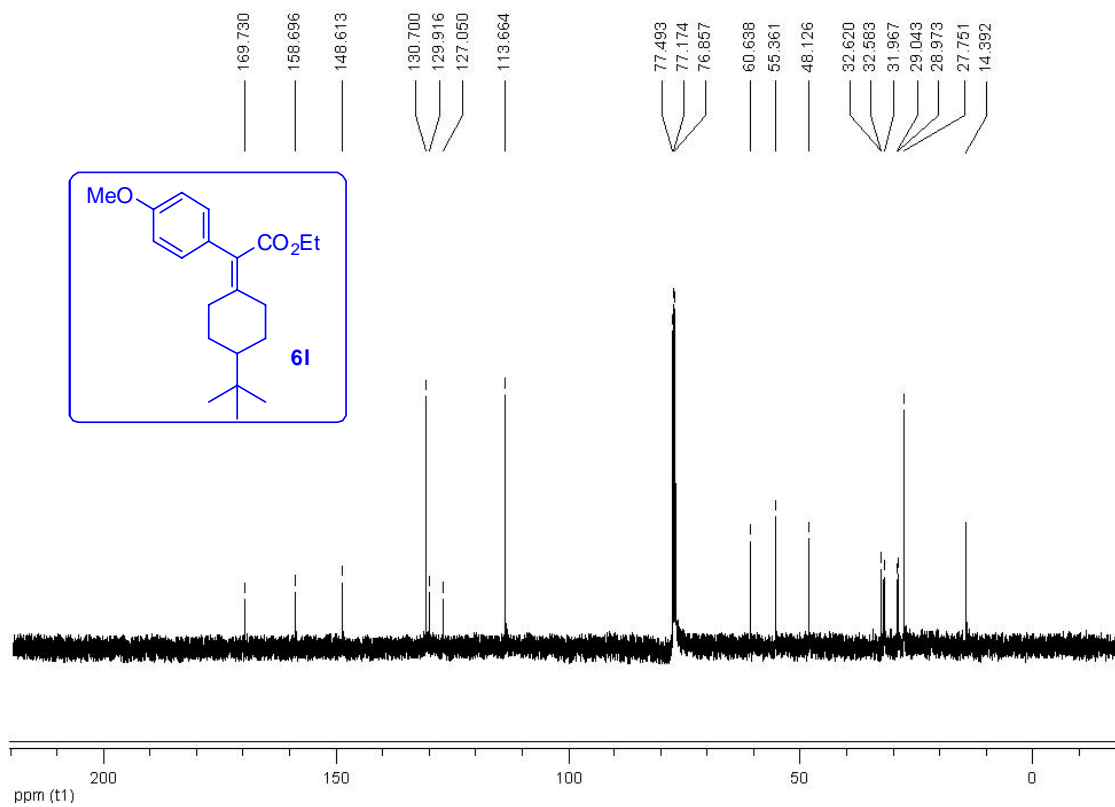

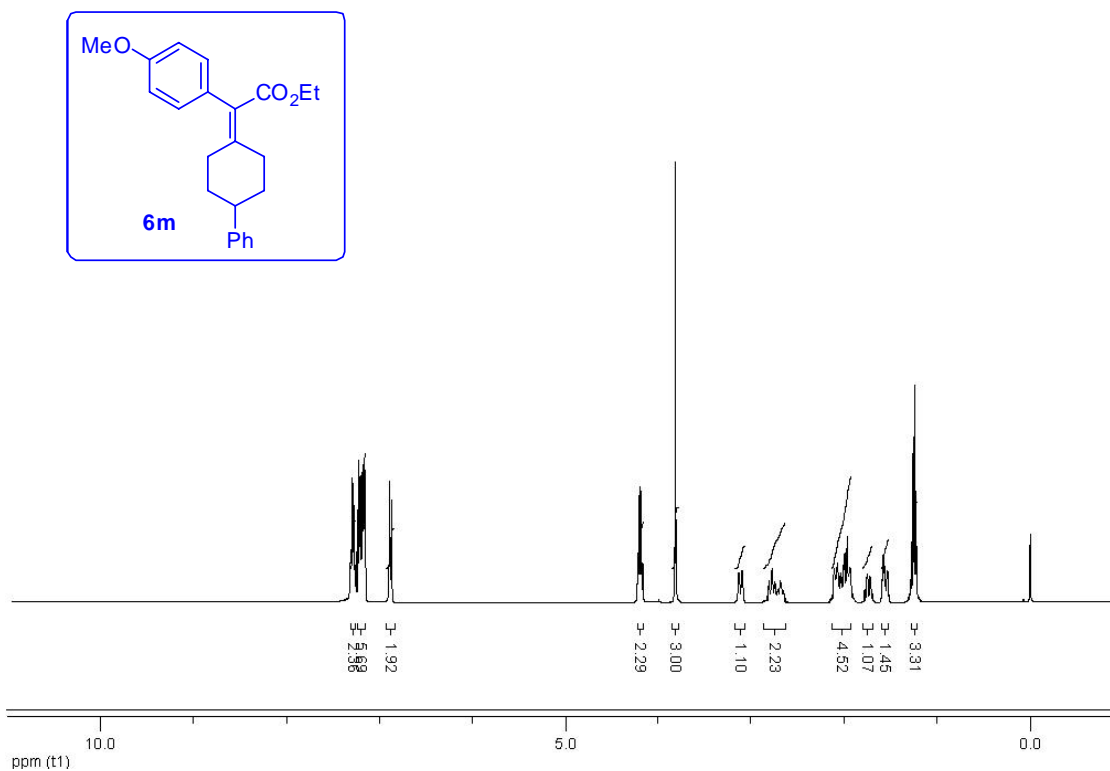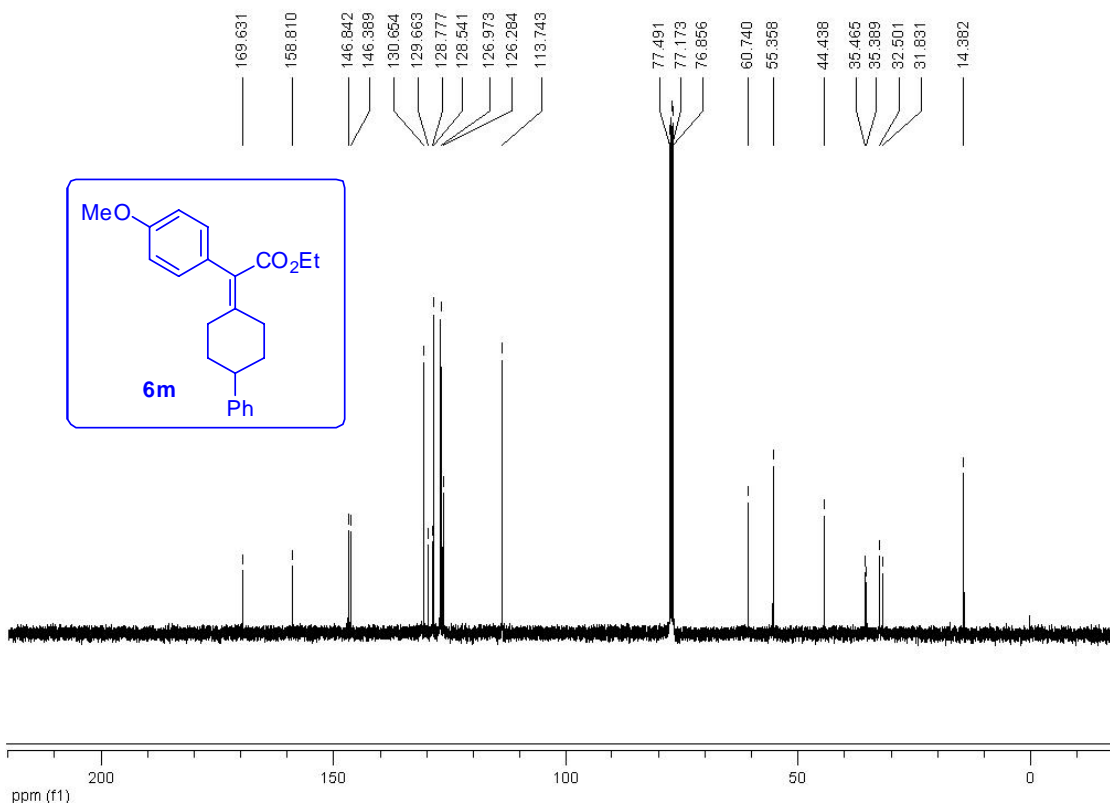

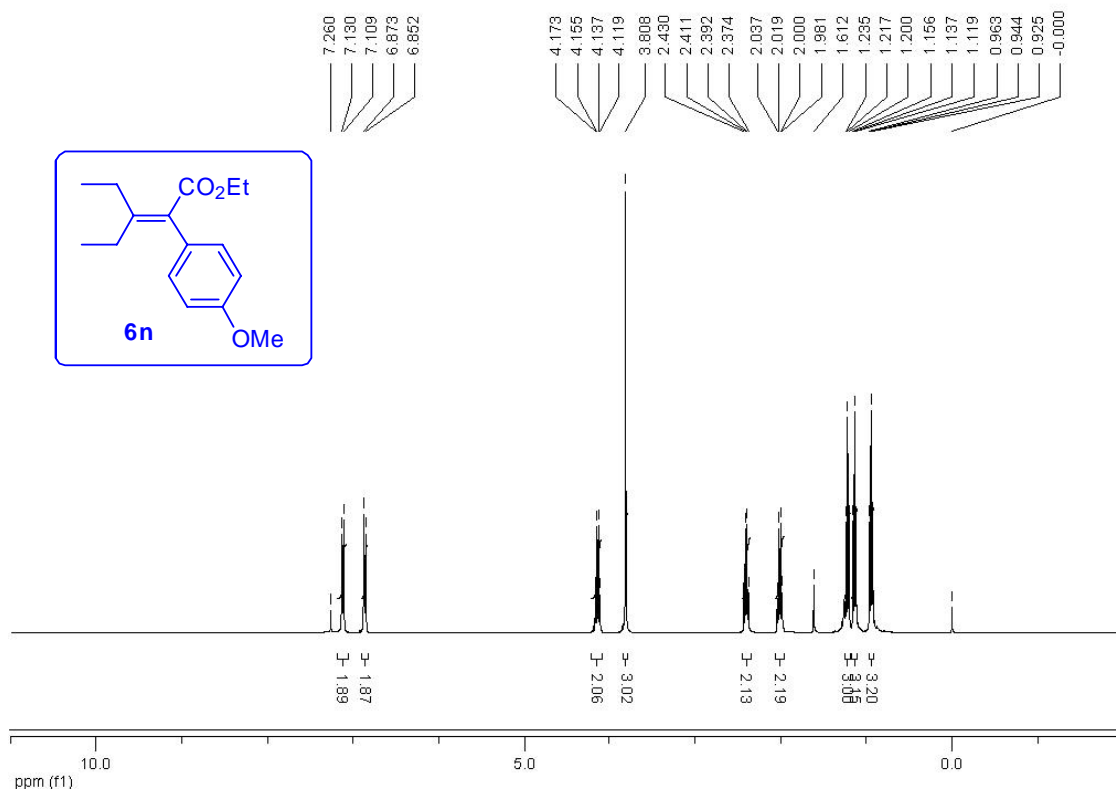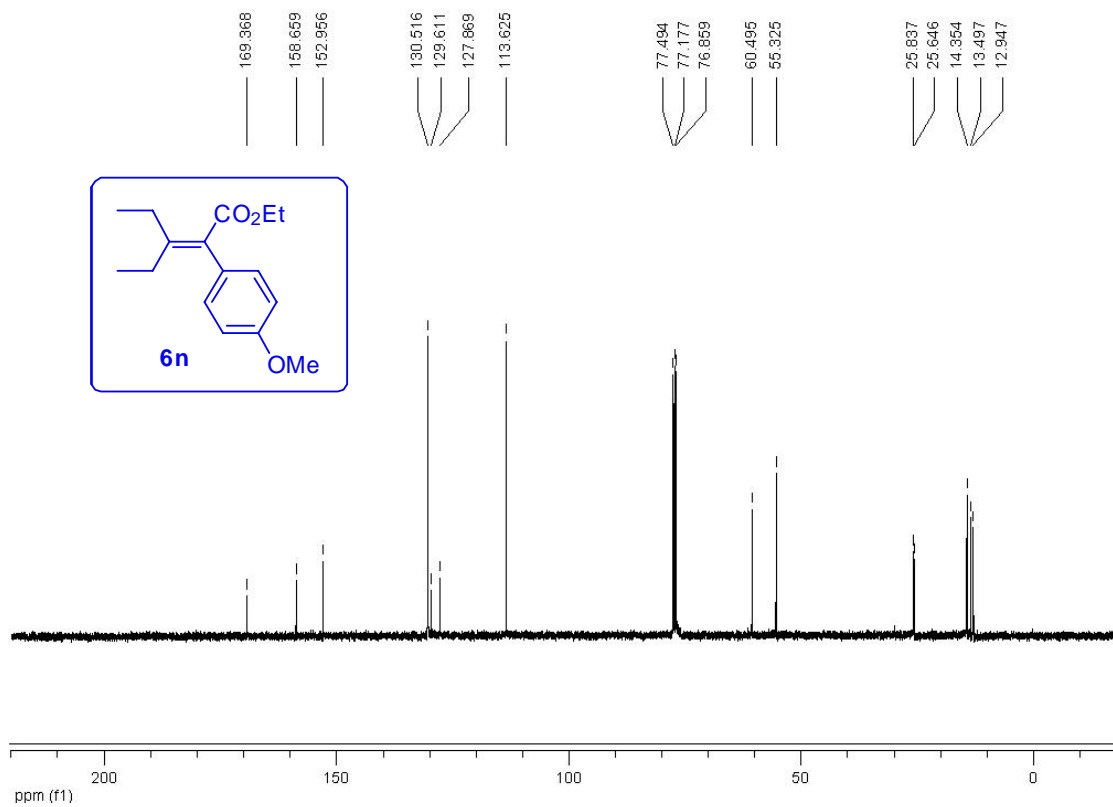

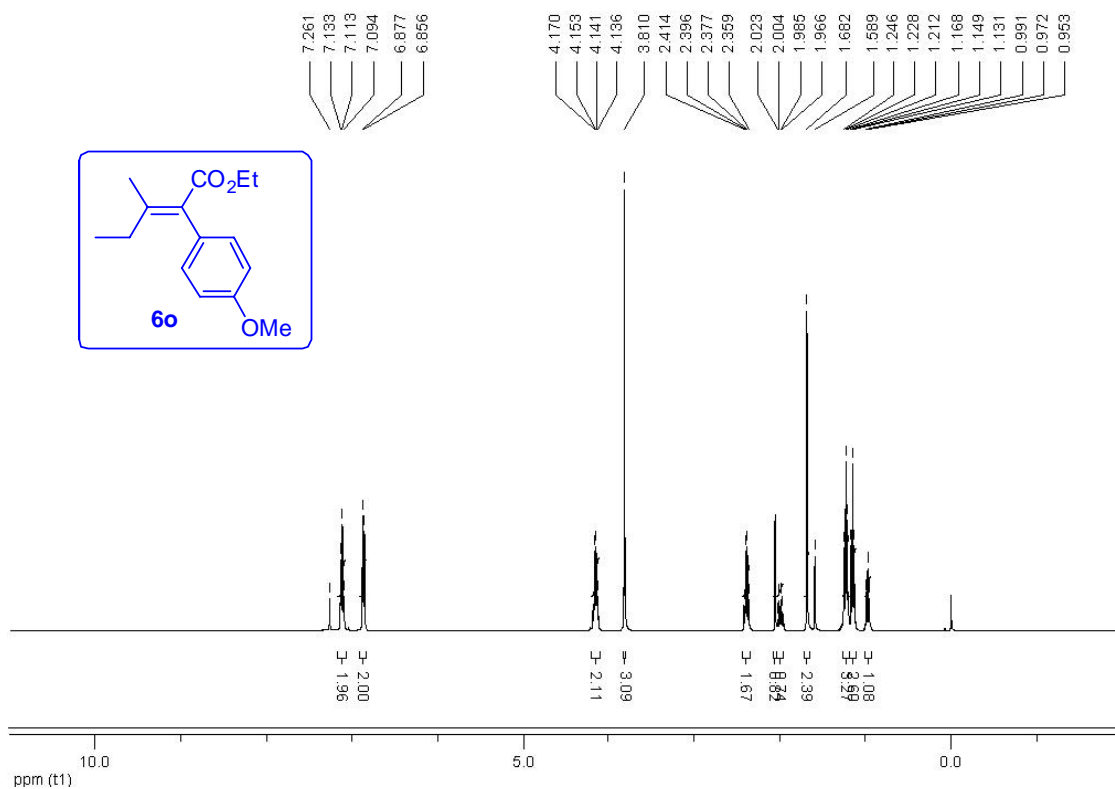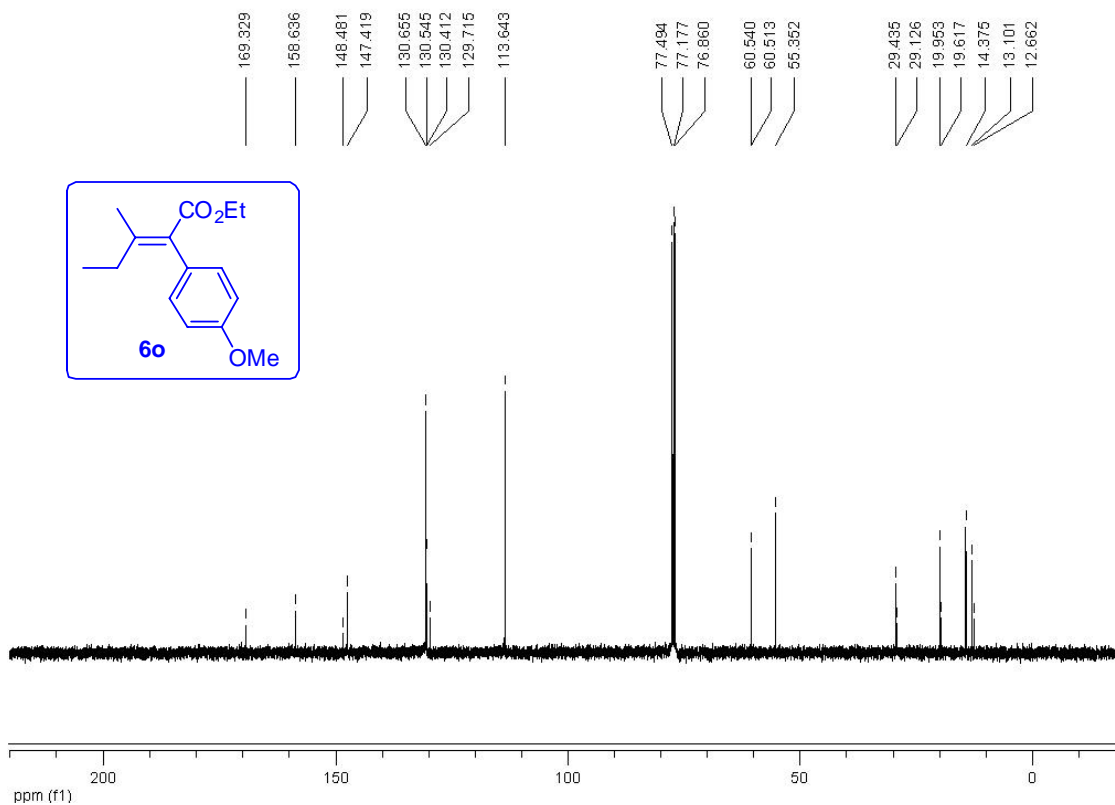

Supplement: c0cc05523a.pdf [file c0cc05523a.pdf]
